# Supplementary material for: Wine yeast phenomics: A standardized fermentation method for assessing quantitative traits of Saccharomyces cerevisiae strains in enological conditions
Source: PLoS One. 2018 Jan 19;13(1):e0190094. doi: 10.1371/journal.pone.0190094 (PMC5774694; doi:10.1371/journal.pone.0190094)
Supplement: S1 Table — (XLSX) [file pone.0190094.s005.xlsx]

## Sheet: S1_Table
Strains	CRBO collection number
C1	L17121
C2	L17122
C3	L17123
C4	L17124
C5	L17125
C6	L17126
C7	L17127
C8	L17128
C9	L17129
C10	L17130
C11	L17131
C12	L17132
C13	L17133
F15	L17134
C14	L17135
C15	L17136
C16	L17137
C17	L17138
GN	L17139
C18	L17140
C19	L17141
M2	L17142
C20	L17143
C21	L17144
C22	L17145
SB	L17146
C23	L17147
C24	L17148
C25	L17149
C26	L17150
C27	L17151
C28	L17152
C29	L17153
C30	L17154
C31	L17155
