# Supplementary material for: Wine yeast phenomics: A standardized fermentation method for assessing quantitative traits of Saccharomyces cerevisiae strains in enological conditions
Source: PLoS One. 2018 Jan 19;13(1):e0190094. doi: 10.1371/journal.pone.0190094 (PMC5774694; doi:10.1371/journal.pone.0190094)
Supplement: S2 Table — (XLSX) [file pone.0190094.s006.xlsx]

## Sheet: Sheet1
S2 Table	Enzymatic assay protocol
Metabolite	Sample (µL)	Dilution level	Assay mix (µL)	Enzyme (µL)
acetaldehyde	50	1	160	5
acetic acid	10 or 5*	1	200	20
glycerol	10	1/40	192	2
malic acid	10	1/10	222	2
SO2	10	1	200	50
pyruvate	30 or 10*	1	250 or 270*	2
glucose	10	1/25	160	1
fructose	10	1/25	160	1
* respectively for white and red must
