# Supplementary material for: Wine yeast phenomics: A standardized fermentation method for assessing quantitative traits of Saccharomyces cerevisiae strains in enological conditions
Source: PLoS One. 2018 Jan 19;13(1):e0190094. doi: 10.1371/journal.pone.0190094 (PMC5774694; doi:10.1371/journal.pone.0190094)
Supplement: S3 Table — (XLSX) [file pone.0190094.s007.xlsx]

## Sheet: Sheet1
Compound	Formula	Type
2-phenylethyl acetate	2-PhC2C2	acetates of higher alcohols
propyl acetate	C3C2	acetates of higher alcohols
butyl acetate	C4C2	acetates of higher alcohols
hexyl acetate	C6C2	acetates of higher alcohols
octyl acetate	C8C2	acetates of higher alcohols
isobutyl actetate	iC4C2	acetates of higher alcohols
isoamyl acetate	iC5C2	acetates of higher alcohols
methyl trans-geranate	C1ger	cinnamates and minor esters
ethyl cinnamate	C2Cin	cinnamates and minor esters
ethyl dihydrocinnamate	C2dhCinn	cinnamates and minor esters
ethyl trans 2-hexanoate	C2hex	cinnamates and minor esters
isobutyl hexanoate	iC4C6	cinnamates and minor esters
ethyl -2 methylbutyrate	C2 2-mC4	ethyl branched acid esters
ethyl isobutyrate	C2iC4	ethyl branched acid esters
ethyl isovalerate	C2iC5	ethyl branched acid esters
ethyl phenylacetate	C2PhC2	ethyl branched acid esters
ethyl decanoate	C2C10	ethyl fatty acid esters
ethyl dodecanoate	C2C12	ethyl fatty acid esters
ethyl propanoate	C2C3	ethyl fatty acid esters
ethyl butyrate	C2C4	ethyl fatty acid esters
ethyl valerate	C2C5	ethyl fatty acid esters
ethyl hexanoate	C2C6	ethyl fatty acid esters
ethyl heptanoate	C2C7	ethyl fatty acid esters
ethyl octanoate	C2C8	ethyl fatty acid esters
ethyl nonanoate	C2C9	ethyl fatty acid esters
isoamyl butyrate	iC5C4	isoamyl esters of fatty acid
isoamyl hexanoate	iC5C6	isoamyl esters of fatty acid
isoamyl octanoate	iC5C8	isoamyl esters of fatty acid
methyl decanoate	C1C10	methyl fatty acid esters
methyl butyrate	C1C4	methyl fatty acid esters
methyl hexanoate	C1C6	methyl fatty acid esters
methyl octanoate	C1C8	methyl fatty acid esters
