# Supplementary material for: Wine yeast phenomics: A standardized fermentation method for assessing quantitative traits of Saccharomyces cerevisiae strains in enological conditions
Source: PLoS One. 2018 Jan 19;13(1):e0190094. doi: 10.1371/journal.pone.0190094 (PMC5774694; doi:10.1371/journal.pone.0190094)
Supplement: S4 Table — Data presented are the mean of six fermentation replicates of SB 14 grape must. The residual sugars (glucose + fructose) at the end of the fermentation was not shown and was always lower than 1.5 g.L-1. Statistical differences within strains and modalities was assayed by Tukey’s honest significant difference test, significance level, α = 0.05, the different groups were shown by a letter code: groups sharing the same letter are non-significantly different. (XLSX) [file pone.0190094.s008.xlsx]

## Sheet: Sheet1
Condition	Strain	CO2max	lp	t35	t50	t80	V50_80	SO2	Acetic acid	Glycerol	Malic acid	Pyruvate	Acetaldehyde
noSk.5_SV	F15	90.9 b	7.4 f	33.9 bc	50.3 bc	94.9 bcd	1.3 de	53 bc	0.37 abc	4.2 f	3.4 ab	15 d	18 de
noSk.5_SV	GN	89.1 b	8.3 f	36.9 ab	57.5 a	123.1 a	0.91 f	54 b	0.32 abcde	4.6 def	3.4 ab	48 abc	16 de
noSk.5_SV	M2	90.4 b	15.6 cdef	39.2 a	56.8 ab	106.9 b	1.16 ef	47 c	0.36 abcd	4.5 ef	3.4 ab	11 d	16 de
noSk.5_SV	SB	90.0 b	14.3 cdef	34.2 bc	47.2 cde	82.4 de	1.63 cd	67 a	0.39 ab	6.1 abcde	3.2 ab	25 bcd	21 de
Sk.125_GB	F15	90.9 b	15.2 cdef	21.0 f	31.7 h	60.8 fgh	2.01 b	26 de	0.26 bcde	6.1 abcde	3.0 ab	37 abcd	15 de
Sk.125_GB	GN	95.0 a	14.2 cdef	25.8 e	40.5 efg	85.2 cde	1.31 de	29 de	0.15 de	5.4 cdef	3.4 ab	56 ab	16 de
Sk.125_GB	M2	91.2 ab	27.8 ab	20.3 f	31.0 h	60.5 fgh	1.97 b	23 e	0.28 abcde	6.3 abcd	3.3 ab	60 a	15 de
Sk.125_GB	SB	90.5 b	28.7 a	23.0 ef	33.3 h	57.7 h	2.4 a	25 de	0.31 abcde	7.8 a	2.7 ab	32 abcd	10 e
Sk.3_SV	F15	88.6 b	10.6 def	20.4 f	30.6 h	59.4 gh	2.06 b	28 de	0.22 bcde	6.3 abcd	3.2 ab	9 d	30 cde
Sk.3_SV	GN	88.3 b	8.6 f	26.9 de	41.8 def	81.5 de	1.49 de	31 d	0.49 a	5.4 cdef	3.0 ab	50 abc	71 a
Sk.3_SV	M2	88.3 b	15.9 cde	23.0 ef	33.6 gh	63.1 fgh	1.98 bc	27 de	0.29 bcde	5.6 bcdef	3.4 a	23 cd	47 abc
Sk.3_SV	SB	87.4 b	19.1 cd	22.4 ef	32.4 h	62.5 fgh	2.04 b	27 de	0.17 cde	7.3 ab	2.4 b	22 cd	60 ab
Sk.5_SV	F15	90.4 b	9.7 ef	23.9 ef	35.4 fgh	73.1 efg	1.57 d	28 de	0.18 bcde	5.9 bcdef	3.1 ab	20 cd	32 cde
Sk.5_SV	GN	89.6 b	7.9 f	30.6 cd	47.6 cd	97.5 bc	1.17 ef	31 d	0.13 e	5.6 bcdef	3.4 ab	49 abc	30 cde
Sk.5_SV	M2	89.9 b	19.9 bc	24.1 ef	36.1 fgh	73.8 ef	1.57 d	28 de	0.25 bcde	5.7 bcdef	3.2 ab	21 cd	32 cde
Sk.5_SV	SB	90.5 b	16.3 cdef	24.0 ef	35.5 fgh	66.0 fgh	1.98 bc	30 de	0.17 cde	6.8 abc	2.4 ab	20 cd	35 bcd
Data presented are the mean of six fermentation replicates of SB 14 grape must.
Statistical differences within strains and modalities was assayed by Tukey's honest significant difference test, significance level, α=0.05
The different groups were shown by a letter code: groups sharing the same letter are non-significantly different.
