# Supplementary material for: Wine yeast phenomics: A standardized fermentation method for assessing quantitative traits of Saccharomyces cerevisiae strains in enological conditions
Source: PLoS One. 2018 Jan 19;13(1):e0190094. doi: 10.1371/journal.pone.0190094 (PMC5774694; doi:10.1371/journal.pone.0190094)
Supplement: S5 Table — The data presented are the average coefficients of variation (CV in %) calculated from the CV values obtained for each strain with 6 replicates. (XLSX) [file pone.0190094.s009.xlsx]

## Sheet: Sheet1
Condition	CO2max	lp	t35	t50	t80	V50_80	SO2	Acetic acid	Glycerol	Malic acid	Pyruvate	Acetaldehyde
noSk.5_SV	2	11.5	6.8	7.4	7.3	7.3	9.1	11.3	6.4	5.4	17.8	17.4
Sk.125_GB	2	9.8	6.4	5	5.3	6.8	9.8	13.8	11.8	19	45.8	32.1
Sk.3_SV	0.8	21.4	8.6	8.4	9.2	13.6	6	61.1	17	14.8	63.2	46.2
Sk.5_SV	2.3	41.2	8	7.3	6.1	6.7	6.2	25	12.1	19.1	27.4	26.2
