# Supplementary material for: Wine yeast phenomics: A standardized fermentation method for assessing quantitative traits of Saccharomyces cerevisiae strains in enological conditions
Source: PLoS One. 2018 Jan 19;13(1):e0190094. doi: 10.1371/journal.pone.0190094 (PMC5774694; doi:10.1371/journal.pone.0190094)
Supplement: S6 Table — (XLSX) [file pone.0190094.s010.xlsx]

## Sheet: S5_Table
Compounds	Name	Type	noSk.5_SV (µg.L-1)	Sk.5_SV (µg.L-1)	Pval	Variation explained (%)
2-PhC2C2	2-phenylethyl acetate	acetates of higher alcohols	202.607	175.276	0.05	1.78
C3C2	propyl acetate	acetates of higher alcohols	30.02	13.6888	0	75.31
C4C2	butyl acetate	acetates of higher alcohols	6.70429	0	0.1	19.28
C6C2	hexyl acetate	acetates of higher alcohols	41.0514	6.67875	0	82.95
C8C2	octyl acetate	acetates of higher alcohols	0.214286	0.4325	0	44.15
iC4C2	isobutyl actetate	acetates of higher alcohols	41.0286	34.2963	0	12.19
iC5C2	isoamyl acetate	acetates of higher alcohols	773.106	609.084	0.01	18.18
C1ger	methyl trans-geranate	cinnamates and minor esters	0.775714	1.09875	0.05	16.73
C2Cin	ethyl cinnamate	cinnamates and minor esters	0.0128571	0.02	0.31	0.14
C2dhCinn	ethyl dihydrocinnamate	cinnamates and minor esters	0.314286	1.52125	0	67.55
C2hex	ethyl trans 2-hexanoate	cinnamates and minor esters	1.33286	1.37125	1	0
iC4C6	isobutyl hexanoate	cinnamates and minor esters	0.0414286	0.1	0	66.35
C2 2-mC4	ethyl -2 methylbutyrate	ethyl branched acid esters	0.571429	3.61625	0	90.13
C2iC4	ethyl isobutyrate	ethyl branched acid esters	10.9557	50.6525	0	93.04
C2iC5	ethyl isovalerate	ethyl branched acid esters	0.915714	5.88	0	94.93
C2PhC2	ethyl phenylacetate	ethyl branched acid esters	0.601429	3.35625	0	80.75
C2C3	ethyl propanoate	ethyl fatty acid esters	63.2371	270.401	0	92.13
C2C4	ethyl butyrate	ethyl fatty acid esters	146.443	119.424	0	46.61
C2C5	ethyl valerate	ethyl fatty acid esters	19.3429	15.2	0	18.52
C2C6	ethyl hexanoate	ethyl fatty acid esters	251.407	175.899	0	24.71
C2C7	ethyl heptanoate	ethyl fatty acid esters	0.17	0.875	0	91.77
C2C8	ethyl octanoate	ethyl fatty acid esters	283.356	132.549	0	51.42
C2C9	ethyl nonanoate	ethyl fatty acid esters	0.134286	0.11625	0.4	2.51
C2C10	ethyl decanoate	ethyl fatty acid esters	164.457	51.6562	0	59.75
C2C12	ethyl dodecanoate	ethyl fatty acid esters	17.2929	7.55375	0	46.17
iC5C4	isoamyl butyrate	isoamyl esters of fatty acid	0.101429	0.19	0	52.64
iC5C6	isoamyl hexanoate	isoamyl esters of fatty acid	0.267143	0.725	0	78.34
iC5C8	isoamyl octanoate	isoamyl esters of fatty acid	0.884286	0.95125	0.5	1.59
C1C4	methyl butyrate	methyl fatty acid esters	0.761429	35.0812	0	75.21
C1C6	methyl hexanoate	methyl fatty acid esters	0.362857	0.26375	0	23.54
C1C8	methyl octanoate	methyl fatty acid esters	0.275714	0.1175	0	53.89
C1C10	methyl decanoate	methyl fatty acid esters	0.12	0.035	0	51.48
