# Supplementary material for: Wine yeast phenomics: A standardized fermentation method for assessing quantitative traits of Saccharomyces cerevisiae strains in enological conditions
Source: PLoS One. 2018 Jan 19;13(1):e0190094. doi: 10.1371/journal.pone.0190094 (PMC5774694; doi:10.1371/journal.pone.0190094)
Supplement: S7 Table — (XLSX) [file pone.0190094.s011.xlsx]

## Sheet: Sheet1
Strain	Grape Must	Exp	Vessel_Modalities	CO2max	lp	t35	t50	t80	V50_80	SO2	Acetic acid	Malic acid	Pyruvate	Glycerol
SB	SB14	1627	noSK.5_SV	86.93	16	38	55	88	1.763636364	59.07493126	0.305574781	3.419525446	21.98289641	7.451995106
GN	SB14	1627	noSK.5_SV	86.48	7	39	61	124	0.923809524	59.38815996	0.657873534	3.797733829	40.19729629	5.789626967
M2	SB14	1627	noSK.5_SV	87.43	9	38	55	110	1.058181818	49.80336199	0.386874493	3.419525446	8.73606013	6.828607054
F15	SB14	1627	noSK.5_SV	86.65	7	32	45	88	1.353488372	41.81603035	0.373324541	3.419525446	8.73606013	4.542850863
SB	SB14	1627	noSK.5_SV	84.21	13	32	45	84	1.492307692	54.28253228	0.305574781	3.192600417	26.95046001	7.036403071
GN	SB14	1627	noSK.5_SV	86.07	7	36	54	111	1.021052632	51.40082832	0.251374973	3.570808799	41.85315082	5.166238915
M2	SB14	1627	noSK.5_SV	86.54	12	36	51	99	1.2125	49.80336199	0.271699901	3.419525446	3.768496527	4.335054845
F15	SB14	1627	noSK.5_SV	85.9	10	36	53	97	1.322727273	51.40082832	0.380099517	3.570808799	13.70362373	4.335054845
GN	SB14	1706	noSK.5_SV	95.13	9	39	60	127	0.868656716417911	54.78589421	0.376575751	2.298172114	56.63022508	3.611692683
F15	SB14	1706	noSK.5_SV	96.24	7	34	51	94	1.35348837209302	52.89672544	0.386738215	3.281513909	18.54557079	3.611692683
SB	SB14	1706	noSK.5_SV	94.09	16	34	47	83	1.61666666666667	68.95465995	0.451100487	3.054588879	23.51313439	5.481856839
M2	SB14	1706	noSK.5_SV	94.97	17	41	60	113	1.09811320754717	52.89672544	0.363025799	3.357155585	15.23386172	4.235080735
F15	SB14	1706	noSK.5_SV	94.65	8	29	43	84	1.41951219512195	46.28463476	0.363025799	3.130230556	18.54557079	3.611692683
M2	SB14	1706	noSK.5_SV	94.46	17	42	62	114	1.11923076923077	46.28463476	0.383350727	3.205872232	18.54557079	3.8194887
GN	SB14	1706	noSK.5_SV	94.22	10	31	49	108	0.986440677966102	50.06297229	0.251238694	3.508438938	43.3833888	4.027284718
F15	SB14	1706	noSK.5_SV	93.85	9	35	53	102	1.18775510204082	57.61964736	0.396900679	3.281513909	18.54557079	3.403896666
M2	SB14	1706	noSK.5_SV	94.26	17	39	57	108	1.14117647058824	48.17380353	0.410450631	3.205872232	13.57800718	4.235080735
F15	SB14	1706	noSK.5_SV	93.62	8	34	52	100	1.2125	62.34256927	0.356250823	3.281513909	16.88971625	3.611692683
F15	SB14	1706	noSK.5_SV	96.45	7	36	54	102	1.2125	59.50881612	0.373188263	3.205872232	16.88971625	3.611692683
F15	SB14	1706	noSK.5_SV	94.75	8	35	53	102	1.18775510204082	62.34256927	0.376575751	3.130230556	20.20142532	3.611692683
M2	SB14	1706	noSK.5_SV	94.56	17	39	58	109	1.14117647058824	47.22921914	0.444325511	2.222530437	18.54557079	3.611692683
SB	SB14	1706	noSK.5_SV	93.48	16	37	53	93	1.455	73.67758186	0.413838119	3.054588879	31.79240706	5.481856839
SB	SB14	1706	noSK.5_SV	93.05	15	34	46	80	1.71176470588235	70.84382872	0.379963239	3.054588879	28.48069799	5.066264805
GN	SB14	1706	noSK.5_SV	94.93	10	39	63	134	0.819718309859155	65.17632242	0.366413287	3.508438938	51.66266148	4.027284718
GN	SB14	1706	noSK.5_SV	95.63	9	40	61	128	0.868656716417911	63.28715365	0.366413287	3.508438938	53.31851601	3.8194887
M2	SB14	1706	noSK.5_SV	94.45	17	38	56	106	1.164	46.28463476	0.376575751	3.357155585	13.57800718	3.8194887
GN	SB14	1706	noSK.5_SV	85.57	9	41	65	147	0.709756097560976	58.56423174	0.369800775	3.508438938	58.28607961	4.027284718
M2	SB14	1706	noSK.5_SV	94.01	18	41	60	113	1.09811320754717	51.00755668	0.393513191	3.357155585	18.54557079	3.8194887
M2	SB14	1706	noSK.5_SV	93.61	16	40	59	113	1.07777777777778	52.89672544	0.407063143	3.432797262	13.57800718	4.027284718
GN	SB14	1706	noSK.5_SV	95.13	9	37	59	123	0.909375	56.67506297	0.349475847	3.357155585	56.63022508	3.8194887
GN	SB14	1706	noSK.5_SV	94.42	9	33	51	114	0.923809523809524	57.61964736	0.356250823	3.357155585	58.28607961	3.8194887
F15	SB14	1706	noSK.5_SV	96.88	7	34	51	93	1.38571428571429	44.39546599	0.390125703	3.054588879	21.85727986	3.8194887
SB	SB14	1706	noSK.5_SV	94.99	15	39	56	96	1.455	66.1209068	0.318988455	3.054588879	36.75997067	5.066264805
SB	SB14	1706	noSK.5_SV	97.92	16	34	47	80	1.76363636363636	76.51133501	0.386738215	3.130230556	23.51313439	5.481856839
M2	SB14	1706	noSK.5_SV	94.71	17	39	58	109	1.14117647058824	50.06297229	0.356250823	2.903305526	15.23386172	4.235080735
SB	SB14	1706	noSK.5_SV	93.59	14	36	50	86	1.61666666666667	69.89924433	0.434163047	2.978947203	35.10411613	5.274060822
F15	SB14	1706	noSK.5_SV	95.28	8	30	46	88	1.38571428571429	49.11838791	0.383350727	3.205872232	18.54557079	3.8194887
SB	SB14	1706	noSK.5_SV	94.17	14	39	56	98	1.38571428571429	65.17632242	0.373188263	3.130230556	36.75997067	5.274060822
GN	SB14	1706	noSK.5_SV	94.73	9	40	64	140	0.765789473684211	66.1209068	0.305438502	3.508438938	54.97437055	4.027284718
SB	SB14	1706	noSK.5_SV	93.44	15	39	56	100	1.32272727272727	71.7884131	0.498525319	3.205872232	31.79240706	5.481856839
SB	SB14	V3	SK.5_SV	87.22	13	23	33	61	2.078571429	34.93011263	0.19026391	2.578605358	5.263251913	7.117013595
F15	SB14	V3	SK.5_SV	90.09	9	26	37	74	1.572972973	31.75464785	0.146226566	2.654247034	0	2.961093248
GN	SB14	V3	SK.5_SV	85.49	8	29	46	93	1.238297872	36.51784503	0.125901638	3.637588829	43.34790621	5.454645456
M2	SB14	V3	SK.5_SV	85.94	11	21	32	66	1.711764706	30.16691546	0.268176134	3.108097094	5.263251913	5.870237491
SB	SB14	V3	SK.5_SV	89.83	14	24	35	62	2.155555556	34.93011263	0.132676614	2.654247034	0	7.948197665
F15	SB14	V3	SK.5_SV	88.37	8	24	36	70	1.711764706	31.75464785	0.17332647	3.335022123	11.88667005	7.117013595
GN	SB14	V3	SK.5_SV	87.37	7	32	49	96	1.238297872	31.75464785	0.08863927	NA	0	5.454645456
M2	SB14	V3	SK.5_SV	86.97	8	28	41	83	1.385714286	31.75464785	0.27495111	3.4106638	15.19837912	6.493625543
SB	SB14	V3	SK.5_SV	88.12	10	23	33	61	2.078571429	38.10557742	0.203813862	2.805530388	6.919106448	7.324809612
F15	SB14	V3	SK.5_SV	86.64	7	22	32	68	1.616666667	31.75464785	0.169938982	3.18373877	16.85423365	6.909217578
GN	SB14	V3	SK.5_SV	85.66	7	25	39	81	1.385714286	33.34238024	0.061539366	2.654247034	0	5.454645456
M2	SB14	V3	SK.5_SV	85.67	7	23	34	69	1.662857143	31.75464785	0.271563622	3.18373877	8.574960982	5.039053421
SB	SB14	V3	SK.5_SV	91.23	11	27	38	69	1.877419355	33.34238024	0.136064102	2.654247034	0	6.493625543
F15	SB14	V3	SK.5_SV	90.59	7	25	36	68	1.81875	30.16691546	0.25801367	3.18373877	8.574960982	7.324809612
GN	SB14	V3	SK.5_SV	89.6	7	27	42	85	1.353488372	30.16691546	0.251238694	3.486305476	33.412779	6.909217578
M2	SB14	V3	SK.5_SV	89.32	8	25	36	71	1.662857143	30.16691546	0.220751302	3.259380447	16.85423365	8.155993682
SB	SB14	V3	SK.5_SV	87.53	18	25	38	72	1.711764706	34.93011263	0.146226566	2.654247034	13.54252459	7.324809612
F15	SB14	V3	SK.5_SV	92.51	9	21	31	62	1.877419355	33.34238024	0.17332647	2.956813741	10.23081552	5.662441473
GN	SB14	V3	SK.5_SV	90.65	6	32	48	100	1.119230769	36.51784503	0.119126662	3.788872183	43.34790621	4.207869352
M2	SB14	V3	SK.5_SV	90.46	10	23	34	69	1.662857143	30.16691546	0.183488934	NA	28.4452154	6.493625543
SB	SB14	V4	SK.5_SV	93.13	18	23	33	60	2.155555556	33.34238024	0.197038886	2.578605358	5.263251913	7.948197665
F15	SB14	V4	SK.5_SV	91.82	8	26	37	72	1.662857143	33.34238024	0.244463718	3.108097094	13.54252459	7.117013595
GN	SB14	V4	SK.5_SV	91.01	8	31	48	98	1.164	34.93011263	0.125901638	4.091438889	53.28303341	6.493625543
M2	SB14	V4	SK.5_SV	91.4	10	26	36	71	1.662857143	30.16691546	0.217363814	3.561947153	0	7.117013595
SB	SB14	V4	SK.5_SV	92.25	20	24	35	63	2.078571429	31.75464785	0.169938982	2.729888711	8.574960982	7.324809612
F15	SB14	V4	SK.5_SV	90.79	10	23	34	67	1.763636364	33.34238024	0.200426374	3.18373877	10.23081552	7.53260563
GN	SB14	V4	SK.5_SV	89.24	8	31	48	99	1.141176471	34.93011263	0.129289126	3.486305476	43.34790621	6.909217578
M2	SB14	V4	SK.5_SV	90.34	11	27	40	80	1.455	30.16691546	0.29188855	3.561947153	10.23081552	7.117013595
SB	SB14	V4	SK.5_SV	89.21	15	23	34	64	1.94	34.93011263	0.200426374	2.578605358	6.919106448	8.155993682
F15	SB14	V4	SK.5_SV	88.16	9	24	35	72	1.572972973	33.34238024	0.25801367	2.881172064	20.16594272	7.117013595
GN	SB14	V4	SK.5_SV	87.73	7	31	48	99	1.141176471	36.51784503	0.125901638	3.864513859	45.00376074	6.909217578
M2	SB14	V4	SK.5_SV	87.39	11	23	35	70	1.662857143	26.99145067	0.335925895	3.335022123	0	7.117013595
SB	SB14	V4	SK.5_SV	90.18	14	21	31	61	1.94	34.93011263	0.13945159	2.502963681	0	8.571585717
F15	SB14	V4	SK.5_SV	88.67	8	22	34	71	1.572972973	33.34238024	0.359638311	3.108097094	6.919106448	7.53260563
GN	SB14	V4	SK.5_SV	87.48	7	25	40	83	1.353488372	31.75464785	0.217363814	3.561947153	15.19837912	6.285829526
M2	SB14	V4	SK.5_SV	87.12	11	21	33	72	1.492307692	30.16691546	0.180101446	2.654247034	0	5.870237491
SB	SB14	V4	SK.5_SV	89.61	20	22	32	59	2.155555556	31.75464785	0.095414246	2.427322005	0	6.285829526
F15	SB14	V4	SK.5_SV	88.66	9	24	36	72	1.616666667	31.75464785	0.166551494	2.956813741	6.919106448	7.324809612
GN	SB14	V4	SK.5_SV	86.75	8	30	48	93	1.293333333	31.75464785	0.068314342	3.259380447	26.78936086	5.246849439
M2	SB14	V4	SK.5_SV	86.79	13	23	35	71	1.616666667	31.75464785	0.217363814	3.108097094	13.54252459	6.70142156
SB	M15	V5	SK.5_SV	95.71	10	39	61	119	1.132758621	31.92118227	0.099978385	1.52626523	33.412779	7.5389171911056
F15	M15	V5	SK.5_SV	93.76	8	38	58	125	0.980597015	41.49753695	0.235477905	1.98011529	71.49743329	7.5389171911056
GN	M15	V5	SK.5_SV	95.41	8	42	64	136	0.9125	28.72906404	0.269352785	1.52626523	0	6.49993710423247
M2	M15	V5	SK.5_SV	92.85	8	48	74	159	0.772941176	38.30541872	0.174503121	1.904473613	38.3803426	7.33112117373097
SB	M15	V5	SK.5_SV	94.19	11	31	48	93	1.46	30.32512315	0.113528337	1.072415171	5.263251913	7.74671320848023
F15	M15	V5	SK.5_SV	99.06	7	35	52	118	0.995454545	31.92118227	0.147403217	2.055756966	11.88667005	6.49993710423247
GN	M15	V5	SK.5_SV	94.15	8	45	65	126	1.07704918	38.30541872	0.262577809	1.75319026	33.412779	4.83756896523546
M2	M15	V5	SK.5_SV	93.82	8	44	67	145	0.842307692	28.72906404	0.120303313	2.207040319	0	6.7077331216071
SB	M15	V5	SK.5_SV	93.04	10	25	39	79	1.6425	36.70935961	0.174503121	0.921131818	11.88667005	7.33112117373097
F15	M15	V5	SK.5_SV	91.47	7	29	44	95	1.288235294	31.92118227	0.201603025	1.374981877	13.54252459	5.46095701735934
GN	M15	V5	SK.5_SV	90.59	7	37	57	118	1.07704918	30.32512315	0.242252881	2.055756966	28.4452154	5.87654905210859
M2	M15	V5	SK.5_SV	92.65	7	35	53	110	1.152631579	36.70935961	0.181278097	1.98011529	0	5.04536498261008
SB	M15	V5	SK.5_SV	96.1	7	32	47	90	1.527906977	43.09359606	0.249027857	1.52626523	63.21816062	5.87654905210859
F15	M15	V5	SK.5_SV	97.5	6	35	51	99	1.36875	36.70935961	0.201603025	1.828831936	0	7.12332515635635
GN	M15	V5	SK.5_SV	95.59	6	48	80	167	0.755172414	30.32512315	0.099978385	2.509607025	8.574960982	5.46095701735934
M2	M15	V5	SK.5_SV	93.1	7	28	41	92	1.288235294	27.13300493	0.147403217	1.601906907	106.2703785	5.25316099998471
SB	M15	V5	SK.5_SV	98.1	9	36	51	94	1.527906977	39.90147783	0.0390036	1.374981877	41.69205167	8.3701012606041
F15	M15	V5	SK.5_SV	97.2	7	33	47	93	1.42826087	38.30541872	0.167728145	1.677548583	8.574960982	6.7077331216071
GN	M15	V5	SK.5_SV	96.15	7	46	72	147	0.876	30.32512315	0.188053073	2.131398643	11.88667005	7.95450922585485
M2	M15	V5	SK.5_SV	96.32	8	41	65	142	0.853246753	28.72906404	0.106753361	1.904473613	84.74426957	5.46095701735934
SB	M15	V6	SK.5_SV	97.77	7	37	53	97	1.493181818	38.30541872	0.140628241	1.299340201	18.51008819	6.49993710423247
F15	M15	V6	SK.5_SV	97.05	7	34	50	91	1.602439024	36.70935961	0.208378001	1.374981877	11.88667005	5.87654905210859
GN	M15	V6	SK.5_SV	93.19	6	43	64	127	1.042857143	36.70935961	0.221927953	1.904473613	NA	4.62977294786083
M2	M15	V6	SK.5_SV	92.28	8	35	51	99	1.36875	38.30541872	0.140628241	1.98011529	31.75692447	5.87654905210859
SB	M15	V6	SK.5_SV	97.82	13	32	47	88	1.602439024	30.32512315	0.079653456	1.072415171	0	7.33112117373097
F15	M15	V6	SK.5_SV	97.95	9	24	37	87	1.314	28.72906404	0.296452689	1.677548583	15.19837912	6.91552913898172
GN	M15	V6	SK.5_SV	97.35	8	44	66	125	1.113559322	28.72906404	0.249027857	1.828831936	38.3803426	6.49993710423247
M2	M15	V6	SK.5_SV	96.18	8	44	67	136	0.952173913	38.30541872	0.106753361	2.131398643	11.88667005	7.12332515635635
SB	M15	V6	SK.5_SV	98.03	9	32	45	82	1.775675676	36.70935961	0.167728145	1.072415171	41.69205167	6.7077331216071
F15	M15	V6	SK.5_SV	96.26	8	31	45	92	1.39787234	30.32512315	0.221927953	1.677548583	45.00376074	5.66875303473396
GN	M15	V6	SK.5_SV	95.5	6	41	60	117	1.152631579	30.32512315	0.269352785	1.98011529	54.93888795	5.25316099998471
M2	M15	V6	SK.5_SV	95.41	8	28	44	93	1.340816327	28.72906404	0.303227665	1.75319026	6.919106448	5.04536498261008
SB	M15	V6	SK.5_SV	98.27	13	29	43	83	1.6425	28.72906404	0.154178193	1.223698524	25.13350633	7.5389171911056
F15	M15	V6	SK.5_SV	96.22	8	33	49	99	1.314	31.92118227	0.140628241	1.904473613	41.69205167	6.7077331216071
GN	M15	V6	SK.5_SV	100.57	8	47	79	173	0.69893617	33.51724138	0.066103504	2.660890378	16.85423365	6.29214108685784
M2	M15	V6	SK.5_SV	94.96	11	30	46	98	1.263461538	36.70935961	0.154178193	1.828831936	35.06863353	6.29214108685784
SB	M15	V6	SK.5_SV	91.85	12	37	56	113	1.152631579	33.51724138	0.0390036	1.52626523	28.4452154	7.95450922585485
F15	M15	V6	SK.5_SV	100.03	7	36	54	111	1.152631579	38.30541872	0.154178193	1.677548583	46.65961528	5.66875303473396
GN	M15	V6	SK.5_SV	92.96	8	46	67	133	0.995454545	38.30541872	0.194828049	2.055756966	13.54252459	5.66875303473396
M2	M15	V6	SK.5_SV	92.12	8	44	67	141	0.887837838	36.70935961	0.127078289	2.358323672	NA	6.49993710423247
SB	M15	V7	noSK.5_SV	98.84	10	43	62	111	1.340816327	36.70935961	0.242252881	1.299340201	51.62717888	4.62977294786083
F15	M15	V7	noSK.5_SV	98.33	8	41	60	115	1.194545455	33.51724138	0.269352785	1.75319026	38.3803426	4.42197693048621
GN	M15	V7	noSK.5_SV	99.5	8	54	88	191	0.637864078	38.30541872	0.208378001	1.98011529	64.87401516	4.00638489573695
M2	M15	V7	noSK.5_SV	98.61	9	58	86	173	0.755172414	43.09359606	0.452277138	1.75319026	11.88667005	4.42197693048621
SB	M15	V7	noSK.5_SV	99.94	12	48	67	117	1.314	44.68965517	0.411627282	1.299340201	0	5.25316099998471
F15	M15	V7	noSK.5_SV	99.75	8	47	70	130	1.095	46.28571429	0.343877521	1.223698524	26.78936086	2.75960879148919
GN	M15	V7	noSK.5_SV	95.07	7	59	93	202	0.602752294	36.70935961	0.154178193	2.055756966	NA	3.38299684361307
M2	M15	V7	noSK.5_SV	91.16	9	61	91	184	0.706451613	41.49753695	0.249027857	1.677548583	59.90645155	5.66875303473396
SB	M15	V7	noSK.5_SV	97.07	10	45	64	112	1.36875	41.49753695	0.228702929	1.374981877	51.62717888	5.46095701735934
F15	M15	V7	noSK.5_SV	94.67	8	42	62	118	1.173214286	38.30541872	0.160953169	1.677548583	16.85423365	3.38299684361307
GN	M15	V7	noSK.5_SV	91.9	7	58	93	200	0.614018692	33.51724138	0.086428432	1.677548583	31.75692447	3.17520082623845
M2	M15	V7	noSK.5_SV	94.17	8	51	76	151	0.876	31.92118227	0.255802833	1.904473613	36.72448807	4.00638489573695
SB	M15	V7	noSK.5_SV	94.91	9	48	67	119	1.263461538	36.70935961	0.269352785	1.450623554	36.72448807	6.49993710423247
F15	M15	V7	noSK.5_SV	95.35	7	50	73	142	0.952173913	43.09359606	0.235477905	1.677548583	18.51008819	4.00638489573695
GN	M15	V7	noSK.5_SV	96.51	7	60	95	203	0.608333333	35.11330049	0.154178193	1.98011529	10.23081552	3.38299684361307
M2	M15	V7	noSK.5_SV	96.74	8	52	75	143	0.966176471	30.32512315	0.269352785	1.148056848	116.2055057	4.00638489573695
SB	M15	V7	noSK.5_SV	97.17	11	46	64	111	1.39787234	31.92118227	0.310002641	1.299340201	48.31546981	6.49993710423247
F15	M15	V7	noSK.5_SV	96.46	8	45	65	123	1.132758621	41.49753695	0.249027857	1.374981877	30.10106993	4.00638489573695
GN	M15	V7	noSK.5_SV	95.73	8	56	87	188	0.65049505	36.70935961	0.167728145	1.98011529	46.65961528	4.83756896523546
M2	M15	V7	noSK.5_SV	94.54	9	49	72	142	0.938571429	31.92118227	0.255802833	1.828831936	6.919106448	4.21418091311158
SB	M15	V8	noSK.5_SV	98.43	10	47	67	119	1.263461538	38.30541872	0.404852306	1.52626523	NA	7.12332515635635
F15	M15	V8	noSK.5_SV	99.59	9	49	72	141	0.952173913	44.68965517	0.391302354	1.75319026	10.23081552	5.25316099998471
GN	M15	V8	noSK.5_SV	98.08	8	61	97	212	0.571304348	38.30541872	0.194828049	1.677548583	43.34790621	4.42197693048621
M2	M15	V8	noSK.5_SV	99.06	9	54	79	152	0.9	39.90147783	0.357427473	1.677548583	8.574960982	6.49993710423247
SB	M15	V8	noSK.5_SV	95.03	9	46	67	120	1.239622642	47.8817734	0.140628241	1.223698524	45.00376074	6.08434506948321
F15	M15	V8	noSK.5_SV	95.77	7	45	66	128	1.059677419	35.11330049	0.276127761	1.75319026	26.78936086	4.00638489573695
GN	M15	V8	noSK.5_SV	97.83	7	52	82	173	0.721978022	31.92118227	0.174503121	2.055756966	61.56230609	3.79858887836233
M2	M15	V8	noSK.5_SV	97.36	8	52	76	145	0.952173913	36.70935961	0.208378001	1.75319026	0	3.5907928609877
SB	M15	V8	noSK.5_SV	89.65	12	44	63	121	1.132758621	44.68965517	0.154178193	0.921131818	28.4452154	4.00638489573695
F15	M15	V8	noSK.5_SV	91.77	9	43	65	131	0.995454545	35.11330049	0.235477905	1.52626523	NA	2.96740480886382
GN	M15	V8	noSK.5_SV	93.15	8	56	90	202	0.586607143	38.30541872	0.215152977	2.131398643	56.59474248	4.21418091311158
M2	M15	V8	noSK.5_SV	95.24	9	51	75	146	0.925352113	36.70935961	0.228702929	1.75319026	0	4.21418091311158
SB	M15	V8	noSK.5_SV	95.42	14	42	60	111	1.288235294	36.70935961	0.357427473	1.223698524	43.34790621	6.29214108685784
F15	M15	V8	noSK.5_SV	95.65	9	45	67	133	0.995454545	35.11330049	0.350652497	1.223698524	0	3.38299684361307
GN	M15	V8	noSK.5_SV	96.27	9	52	84	189	0.625714286	44.68965517	0.167728145	2.055756966	51.62717888	4.62977294786083
M2	M15	V8	noSK.5_SV	94.21	10	47	69	140	0.925352113	38.30541872	0.255802833	1.677548583	10.23081552	3.38299684361307
SB	M15	V8	noSK.5_SV	97.01	10	43	61	108	1.39787234	35.11330049	0.310002641	1.374981877	11.88667005	5.25316099998471
F15	M15	V8	noSK.5_SV	93.59	8	45	67	131	1.0265625	31.92118227	0.262577809	1.52626523	33.412779	4.21418091311158
GN	M15	V8	noSK.5_SV	92.74	7	57	92	202	0.597272727	43.09359606	0.140628241	1.904473613	6.919106448	2.96740480886382
M2	M15	V8	noSK.5_SV	91.52	8	46	68	140	0.9125	39.90147783	0.310002641	1.450623554	79.77670597	3.17520082623845
