# Supplementary material for: Wine yeast phenomics: A standardized fermentation method for assessing quantitative traits of Saccharomyces cerevisiae strains in enological conditions
Source: PLoS One. 2018 Jan 19;13(1):e0190094. doi: 10.1371/journal.pone.0190094 (PMC5774694; doi:10.1371/journal.pone.0190094)
Supplement: S8 Table — (XLSX) [file pone.0190094.s012.xlsx]

## Sheet: Sheet1
Strain	Grape_Must	CO2max	lp	t35	t50	t80	V50_80	Aceticacid	Glycerol	Malicacid	Pyruvate	SO2
C1	SB15	94.96	43	29	44	91	1.29574	0.346225	4.75065	2.36054	12.0478	65.778
C1	SB15	95.08	42	30	45	91	1.32391	0.3259	4.33505	2.2849	12.0478	48.2059
C1	CS15	110.76	8	36	51	92	1.60976	0.197175	5.16624	2.13362	16.2731	40.4065
C1	CS15	110.67	9	38	55	99	1.5	0.264925	6.62081	2.13362	0	54.7211
C1	M14	90.76	5	39	57	106	1.26735	0.197175	4.33505	1.90669	46.0784	36.9297
C1	M14	103.39	6	37	51	89	1.63421	0.386874	4.12726	2.13362	21.2406	42.004
C1	M15	92.85	9	45	67	133	0.995455	0.17685	3.50387	1.60413	41.1109	43.6641
C1	M15	95.77	8	42	62	118	1.17321	0.170075	3.71167	1.67977	51.046	38.8717
C1	SB14	86.71	12	31	46	89	1.35349	0.373325	4.54285	3.57081	8.73606	59.3882
C1	SB14	88.41	9	31	44	86	1.38571	0.332675	4.33505	3.41953	17.0153	43.4135
C2	SB15	93.66	25	27	40	82	1.45	0.292025	4.33505	2.51183	13.7036	57.7907
C2	SB15	94.29	20	34	46	95	1.24286	0.454624	3.50387	2.51183	13.7036	59.3882
C2	CS15	109.27	7	37	53	100	1.40426	0.474949	4.12726	2.36054	51.046	48.3938
C2	CS15	109.94	8	36	51	96	1.46667	0.488499	4.95844	2.43618	0	46.1386
C2	M14	89.29	5	37	55	111	1.10893	0.264925	3.71167	1.90669	65.9487	50.0226
C2	M14	86.18	6	34	50	107	1.08947	0.237825	4.12726	2.05798	70.9163	48.1119
C2	M15	93.36	7	46	67	139	0.9125	0.31235	3.71167	1.90669	31.1757	43.3509
C2	M15	95.25	8	41	61	120	1.11356	0.2988	3.91946	1.90669	41.1109	46.5458
C2	SB14	86.88	6	30	42	87	1.29333	0.210725	6.82861	3.57081	25.2946	59.3882
C2	SB14	87.93	7	34	49	104	1.05818	0.292025	4.33505	3.49517	10.3919	41.816
C3	SB15	3.82	66	NA	NA	NA	NA	NA	NA	NA	NA	NA
C3	SB15	1.6	NA	NA	NA	NA	NA	NA	NA	NA	NA	NA
C3	CS15	108.6	9	39	57	106	1.34694	0.2988	5.78963	2.51183	0	41.9726
C3	CS15	109.48	10	40	56	109	1.24528	0.292025	5.99742	2.43618	0	49.6467
C3	M14	90.66	6	41	59	111	1.19423	0.0955505	4.75065	1.98233	41.1109	44.6038
C3	M14	102.89	7	38	52	88	1.725	0.224275	4.95844	2.43618	16.2731	38.5271
C3	M15	92.93	9	46	68	132	1.02656	0.0549007	4.75065	1.67977	46.0784	45.5748
C3	M15	95.49	8	48	68	129	1.07705	0.102325	5.16624	1.98233	26.2082	43.6641
C3	SB14	87.25	28	37	52	94	1.38571	0.129425	4.75065	3.72209	7.08021	38.6211
C3	SB14	87.12	24	33	46	83	1.57297	0.1362	4.54285	3.57081	8.73606	37.0236
C4	SB15	93.96	29	29	41	82	1.48537	0.28525	4.12726	2.36054	13.7036	86.5451
C4	SB15	94.48	30	30	40	79	1.56154	0.407199	4.33505	2.43618	13.7036	65.778
C4	CS15	109.97	11	33	47	80	2	0.468174	6.20522	1.90669	0	55.0656
C4	CS15	109.74	14	30	44	76	2.0625	0.454624	5.99742	1.98233	0	56.6631
C4	M14	90.05	7	33	46	82	1.725	0.20395	3.50387	1.52848	41.1109	39.1849
C4	M14	101.88	7	33	45	77	1.94063	0.359775	4.95844	1.98233	31.1757	53.2176
C4	M15	93.99	9	38	56	99	1.52791	0.210725	4.33505	1.3772	51.046	43.9773
C4	M15	95.53	13	33	49	89	1.6425	0.237825	4.33505	1.3772	46.0784	43.3509
C4	SB14	86.82	12	36	52	90	1.53158	0.508824	4.95844	3.41953	23.6388	49.8034
C4	SB14	86.42	12	29	40	77	1.57297	0.447849	5.16624	3.1926	17.0153	59.3882
C5	SB15	94.31	10	31	42	76	1.79118	0.33945	4.12726	2.2849	20.327	78.5578
C5	SB15	96.62	12	33	45	80	1.74	0.644324	3.91946	2.2849	18.6712	72.1679
C5	CS15	109.8	9	34	50	89	1.69231	0.413974	4.54285	2.20926	36.1433	49.3335
C5	CS15	110.38	8	37	54	97	1.53488	0.468174	4.33505	2.20926	21.2406	49.6781
C5	M14	88.53	6	33	48	92	1.41136	0.237825	3.29607	2.05798	56.0136	43.3195
C5	M14	104.03	6	34	48	86	1.63421	0.2988	4.75065	2.20926	31.1757	48.7071
C5	M15	93.65	8	41	61	117	1.17321	0.237825	3.08828	1.67977	41.1109	51.3069
C5	M15	94.96	8	40	59	108	1.34082	0.237825	2.67269	1.75541	70.9163	58.6677
C5	SB14	87.25	7	31	44	88	1.32273	0.495274	4.12726	3.57081	13.7036	57.7907
C5	SB14	87.73	7	32	46	89	1.35349	0.319125	3.91946	3.57081	20.327	48.2059
C6	SB15	93.12	27	31	42	84	1.45	0.332675	4.95844	2.51183	33.5739	62.5831
C6	SB15	93.84	34	32	44	86	1.45	0.549474	4.75065	2.58747	36.8856	60.9856
C6	CS15	109.18	8	37	53	107	1.22222	0.549474	5.78963	2.66311	11.3055	48.0493
C6	CS15	110.08	8	37	54	106	1.26923	0.529149	5.58183	2.51183	31.1757	40.0619
C6	M14	85.15	6	34	51	111	1.035	0.31235	4.54285	2.13362	85.8189	35.3635
C6	M14	103.3	18	51	69	126	1.08947	0.596899	5.37403	2.51183	80.8514	48.0806
C6	M15	93.16	7	45	67	149	0.80122	0.2988	4.95844	1.83105	105.689	45.2615
C6	M15	95.04	7	43	64	142	0.842308	0.2717	4.54285	1.90669	56.0136	35.0503
C6	SB14	86.77	8	36	52	102	1.164	0.508824	4.54285	3.57081	33.5739	48.2059
C6	SB14	87.61	8	35	51	98	1.2383	0.515599	4.95844	3.57081	30.2622	38.6211
C7	SB15	94.55	27	26	39	83	1.38409	0.502049	4.33505	2.2849	17.0153	83.3502
C7	SB15	93.21	31	31	42	83	1.48537	0.596899	4.54285	2.2849	33.5739	84.9476
C7	CS15	109.81	10	40	58	106	1.375	0.413974	4.95844	2.36054	0	43.8833
C7	CS15	110.06	8	38	55	100	1.46667	0.346225	4.54285	2.36054	26.2082	42.9437
C7	M14	96.36	6	35	50	93	1.44419	0.2988	3.91946	2.05798	26.2082	40.4378
C7	M14	104.6	6	37	51	90	1.59231	0.332675	5.16624	2.2849	41.1109	42.6617
C7	M15	93.51	8	45	67	128	1.07705	0.2446	3.50387	1.60413	46.0784	42.3798
C7	M15	96.36	9	43	64	120	1.17321	0.251375	4.12726	1.67977	16.2731	40.7824
C7	SB14	86.63	13	34	51	91	1.455	0.651099	4.12726	3.64645	20.327	52.9983
C7	SB14	85.19	13	34	49	90	1.41951	0.36655	4.95844	3.79773	15.3595	45.011
C8	SB15	93.67	9	33	46	87	1.48537	0.359775	4.33505	2.36054	36.8856	84.9476
C8	SB15	94.18	11	40	53	101	1.26875	0.319125	4.33505	2.36054	51.7883	66.0913
C8	CS15	109.39	9	39	56	106	1.32	0.3259	5.16624	2.13362	51.046	51.5888
C8	CS15	109.27	9	39	57	108	1.29412	0.31235	5.16624	2.2849	80.8514	50.9623
C8	M14	100.77	6	34	48	88	1.5525	0.2446	5.16624	2.36054	75.8838	44.6038
C8	M14	99.09	7	36	50	91	1.51463	0.1362	4.95844	2.2849	100.722	53.5308
C8	M15	93.02	8	44	65	129	1.02656	0.1633	4.33505	1.75541	100.722	60.923
C8	M15	97.02	8	46	65	131	0.995455	0.20395	4.33505	1.3772	46.0784	49.4275
C8	SB14	86.92	8	32	46	90	1.32273	0.549474	4.33505	3.49517	38.5414	60.9856
C8	SB14	85.81	8	41	61	107	1.26522	0.3259	3.71167	3.49517	50.1324	46.6084
C9	SB15	94.25	22	28	41	83	1.45	0.305575	4.33505	2.2849	18.6712	58.1039
C9	SB15	93.73	17	29	41	82	1.48537	0.522374	4.12726	2.20926	15.3595	73.4521
C9	CS15	108.84	9	33	48	89	1.60976	0.413974	5.58183	2.2849	0	51.2442
C9	CS15	109.87	9	35	50	93	1.53488	0.454624	4.75065	2.13362	0	42.9437
C9	M14	90.43	7	32	47	89	1.47857	0.278475	3.71167	2.05798	46.0784	38.2139
C9	M14	108.35	6	32	42	77	1.77429	0.407199	4.54285	2.36054	11.3055	41.3775
C9	M15	93.79	7	50	72	139	0.980597	0.2988	3.50387	1.67977	26.2082	41.7534
C9	M15	96.93	7	45	65	124	1.11356	0.319125	3.71167	1.60413	21.2406	40.4691
C9	SB14	86.92	6	30	41	79	1.53158	0.346225	4.54285	3.1926	30.2622	52.9983
C9	SB14	87.48	8	33	46	89	1.35349	0.474949	4.54285	3.41953	18.6712	62.5831
C10	SB15	93.99	23	28	41	83	1.45	0.33945	4.75065	2.43618	15.3595	54.5958
C10	SB15	93.69	30	29	40	82	1.45	0.353	4.75065	2.20926	10.3919	81.7527
C10	CS15	109.77	9	37	54	101	1.40426	0.413974	5.16624	2.13362	16.2731	51.5574
C10	CS15	109.68	8	36	51	96	1.46667	0.427524	5.16624	2.2849	11.3055	42.9437
C10	M14	98.6	5	37	52	98	1.35	0.2988	3.91946	2.13362	0	42.3485
C10	M14	103.14	6	34	47	85	1.63421	0.31235	5.16624	2.20926	41.1109	49.6781
C10	M15	94.46	7	48	71	135	1.02656	0.28525	3.91946	1.52848	41.1109	42.0666
C10	M15	96.43	7	44	65	127	1.05968	0.278475	4.12726	1.60413	0	42.3798
C10	SB14	87.44	7	40	59	107	1.2125	0.36655	4.54285	3.49517	12.0478	46.6084
C10	SB14	85.24	6	30	42	87	1.29333	0.25815	4.54285	3.41953	15.3595	41.816
C11	SB15	93.64	46	28	41	78	1.64595	0.386874	4.54285	2.13362	13.7036	75.3628
C11	SB15	93.8	48	25	37	70	1.84545	0.3801	5.16624	2.20926	10.3919	52.9983
C11	CS15	110.84	9	34	47	81	1.94118	0.447849	5.99742	1.98233	46.0784	53.1549
C11	CS15	110.27	9	33	47	82	1.88571	0.447849	5.78963	1.98233	0	45.8254
C11	M14	90.23	6	35	50	89	1.59231	0.264925	3.71167	1.90669	21.2406	42.6931
C11	M14	102.73	6	35	48	89	1.51463	0.353	4.33505	1.98233	21.2406	42.6617
C11	M15	93.15	8	41	60	113	1.23962	0.2446	4.12726	1.3772	41.1109	46.859
C11	M15	96.09	9	44	63	115	1.26346	0.264925	3.91946	1.60413	46.0784	48.7697
C11	SB14	86.24	10	30	43	79	1.61667	0.610449	4.75065	3.11696	15.3595	54.5958
C11	SB14	85.13	12	37	53	92	1.49231	0.474949	5.16624	3.26824	17.0153	52.9983
C12	SB15	94.72	27	31	42	87	1.35333	0.549474	3.91946	2.2849	13.7036	70.5704
C12	SB15	94.48	23	27	40	82	1.45	0.278475	3.91946	2.2849	12.0478	73.7654
C12	CS15	110.09	10	35	50	94	1.5	0.332675	5.37403	2.20926	0	51.2442
C12	CS15	110.16	7	34	48	92	1.5	0.278475	4.54285	2.2849	0	39.1223
C12	M14	101.44	5	35	50	91	1.51463	0.292025	3.50387	2.05798	11.3055	42.3485
C12	M14	86.4	6	36	53	109	1.10893	0.14975	3.71167	1.98233	51.046	49.0516
C12	M15	93.07	7	41	64	129	1.01077	0.183625	3.91946	1.83105	0	40.7824
C12	M15	97.94	7	47	69	136	0.980597	0.2175	3.91946	1.67977	21.2406	52.2779
C12	SB14	87.73	7	31	44	88	1.32273	0.36655	3.71167	3.41953	10.3919	49.8034
C12	SB14	86.26	15	34	48	89	1.41951	0.359775	3.91946	3.41953	18.6712	45.011
C13	SB15	93.03	23	26	38	79	1.48537	0.556249	3.71167	1.52848	31.918	84.9476
C13	SB15	93.75	29	29	41	82	1.48537	0.251375	4.12726	2.20926	17.0153	52.9983
C13	CS15	109.94	8	38	55	104	1.34694	0.468174	5.78963	2.20926	0	41.3775
C13	CS15	109.47	8	37	54	104	1.32	0.346225	6.20522	2.05798	0	54.4391
C13	M14	87.8	5	36	53	111	1.07069	0.2175	3.08828	1.83105	51.046	39.8114
C13	M14	101.06	6	36	50	91	1.51463	0.319125	3.71167	2.13362	56.0136	41.7221
C13	M15	93.62	7	44	65	135	0.938571	0.2175	4.12726	1.75541	41.1109	50.0539
C13	M15	97.01	7	48	70	138	0.966176	0.197175	3.71167	1.52848	46.0784	43.3509
C13	SB14	86.42	8	33	47	92	1.29333	0.468174	4.33505	3.1926	30.2622	60.9856
C13	SB14	86.4	7	30	43	85	1.38571	0.441074	4.54285	3.34388	31.918	57.7907
F15	SB15	93.67	46	27	40	79	1.56154	0.529149	4.95844	2.2849	7.08021	67.3755
F15	SB15	94.35	51	31	45	84	1.56154	0.292025	4.54285	2.36054	0	49.8034
F15	CS15	109.27	9	37	53	95	1.57143	0.596899	6.62081	2.20926	11.3055	49.96
F15	CS15	110.08	9	39	56	105	1.34694	0.386874	6.82861	2.20926	0	52.1839
F15	M14	99.17	6	36	51	92	1.51463	0.332675	4.95844	2.05798	56.0136	49.3648
F15	M14	97.03	6	36	50	89	1.59231	0.264925	4.12726	2.13362	0	47.7674
F15	M15	96.01	8	50	73	140	0.980597	0.1904	3.91946	1.90669	21.2406	40.1246
F15	M15	97.8	8	47	67	132	1.01077	0.2988	4.33505	1.75541	11.3055	40.1559
F15	SB14	86.65	7	32	45	88	1.35349	0.373325	4.54285	3.41953	8.73606	41.816
F15	SB14	85.9	10	36	53	97	1.32273	0.3801	4.33505	3.57081	13.7036	51.4008
C14	SB15	93.6	42	29	43	88	1.35333	0.31235	4.54285	2.36054	8.73606	56.1932
C14	SB15	NA	NA	NA	NA	NA	NA	NA	NA	NA	NA	NA
C14	CS15	109.52	8	37	53	96	1.53488	0.33945	5.16624	2.13362	21.2406	42.9437
C14	CS15	109.89	8	37	52	95	1.53488	0.332675	5.99742	2.13362	0	51.5574
C14	M14	88.93	6	37	53	100	1.32128	0.1904	3.29607	2.05798	26.2082	40.7824
C14	M14	104.24	6	35	50	90	1.5525	0.359775	4.33505	2.2849	16.2731	44.2592
C14	M15	93	8	46	68	134	0.995455	0.170075	4.12726	1.60413	70.9163	52.5911
C14	M15	94.81	7	41	61	120	1.11356	0.183625	4.12726	1.67977	41.1109	40.7824
C14	SB14	88.92	6	29	40	77	1.57297	0.922098	4.75065	3.49517	17.0153	51.4008
C14	SB14	87.36	12	35	52	92	1.455	0.319125	3.91946	2.66311	13.7036	51.4008
C15	SB15	95.18	49	32	47	93	1.32391	0.2717	4.12726	1.90669	3.7685	52.9983
C15	SB15	94.19	47	28	43	86	1.41628	0.292025	3.91946	2.2849	12.0478	52.9983
C15	CS15	108.87	8	36	52	106	1.22222	0.481724	5.78963	2.43618	11.3055	49.96
C15	CS15	109.41	8	36	53	110	1.15789	0.610449	5.58183	2.13362	0	48.0806
C15	M14	91.81	5	36	52	107	1.12909	0.292025	3.50387	2.05798	16.2731	35.9587
C15	M14	104.61	6	38	53	97	1.41136	0.359775	5.58183	2.43618	60.9811	45.5121
C15	M15	93.61	7	51	76	163	0.755172	0.353	3.91946	1.75541	51.046	41.4402
C15	M15	95.56	7	46	67	146	0.831646	0.3259	4.33505	1.75541	51.046	38.5585
C15	SB14	86.77	11	29	41	85	1.32273	0.33945	4.95844	3.57081	8.73606	40.2186
C15	SB14	86.91	14	34	49	98	1.18776	0.461399	4.95844	3.64645	23.6388	45.011
C16	SB15	93.7	11	36	50	98	1.26875	0.434299	4.12726	2.51183	18.6712	62.5831
C16	SB15	93.32	13	31	44	88	1.38409	0.2717	4.54285	2.43618	18.6712	73.7654
C16	CS15	109.54	9	39	58	109	1.29412	0.447849	5.16624	2.2849	0	61.1422
C16	CS15	110.14	8	37	53	98	1.46667	0.393649	4.95844	2.2849	16.2731	51.2442
C16	M14	98.95	6	33	46	84	1.63421	0.2988	4.12726	2.13362	41.1109	56.7257
C16	M14	104.73	6	36	51	89	1.63421	0.3801	4.12726	2.20926	31.1757	49.0516
C16	M15	93.64	7	43	63	122	1.11356	0.237825	4.12726	1.75541	70.9163	58.6677
C16	M15	96.12	7	47	68	132	1.02656	0.2717	3.50387	1.67977	36.1433	49.7407
C16	SB14	87.86	6	31	43	85	1.38571	0.278475	3.71167	3.1926	21.9829	60.9856
C16	SB14	85.35	7	33	47	94	1.2383	0.319125	4.54285	3.49517	13.7036	NA
C17	SB15	93.23	11	36	50	94	1.38409	0.556249	4.75065	2.20926	17.0153	80.1552
C17	SB15	94.25	13	32	44	85	1.48537	0.488499	4.54285	2.51183	15.3595	68.973
C17	CS15	110.09	8	34	49	90	1.60976	0.488499	5.37403	2.2849	0	42.6304
C17	CS15	109.74	7	35	50	92	1.57143	0.563024	5.78963	2.43618	0	51.5574
C17	M14	87.32	5	36	52	110	1.07069	0.25815	5.37403	2.05798	60.9811	46.8277
C17	M14	104.8	5	35	48	85	1.67838	0.407199	4.33505	2.20926	46.0784	37.8693
C17	M15	92.59	8	43	64	128	1.02656	0.278475	4.12726	1.83105	36.1433	52.5911
C17	M15	95.25	8	41	61	119	1.13276	0.2717	5.37403	1.83105	46.0784	49.3962
C17	SB14	105.26	6	30	43	73	1.94	NA	NA	NA	NA	NA
C17	SB14	86.44	9	32	45	87	1.38571	0.413974	4.12726	3.79773	28.6063	43.4135
GN	SB15	93.08	14	33	48	105	1.06842	0.698523	4.33505	2.51183	35.2297	76.9603
GN	SB15	94.04	20	40	57	120	0.966667	0.542699	4.33505	2.58747	48.4766	73.7654
GN	CS15	109.22	7	40	63	130	0.985075	0.305575	6.62081	2.81439	75.8838	49.3335
GN	CS15	108.48	7	44	69	143	0.891892	0.305575	5.37403	2.81439	85.8189	40.0933
GN	M14	100.57	5	39	59	121	1.00161	0.197175	4.75065	2.66311	60.9811	45.8567
GN	M14	95.41	5	39	60	123	0.985714	0.2175	4.95844	2.66311	31.1757	40.4378
GN	M15	92.72	7	57	90	202	0.586607	0.210725	3.71167	2.20926	90.7865	41.7534
GN	M15	96.23	7	58	92	208	0.566379	0.210725	3.50387	2.20926	85.8189	42.0666
GN	SB14	86.48	7	39	61	124	0.92381	0.657874	5.78963	3.79773	40.1973	59.3882
GN	SB14	86.07	7	36	54	111	1.02105	0.251375	5.16624	3.57081	41.8532	51.4008
C18	SB15	94.47	18	28	40	73	1.84545	0.698523	4.54285	2.05798	15.3595	76.9603
C18	SB15	94.54	15	36	48	84	1.69167	0.535924	3.91946	2.20926	25.2946	83.3502
C18	CS15	110.05	11	34	48	83	1.88571	0.3259	5.16624	2.05798	31.1757	44.2279
C18	CS15	109.9	10	34	48	84	1.83333	0.31235	5.37403	2.13362	36.1433	45.8254
C18	M14	99.74	6	35	49	85	1.725	0.2175	3.91946	1.98233	65.9487	42.0353
C18	M14	86.88	7	35	50	99	1.26735	0.1633	3.91946	1.83105	56.0136	49.7094
C18	M15	93.86	8	42	61	114	1.23962	0.1091	4.12726	1.75541	11.3055	42.6931
C18	M15	97.52	9	41	59	107	1.36875	0.156525	4.54285	1.67977	31.1757	42.3798
C18	SB14	86.92	11	31	44	80	1.61667	0.806923	5.37403	3.49517	33.5739	56.1932
C18	SB14	86.09	8	31	43	79	1.61667	0.23105	5.78963	3.1926	26.9505	40.2186
C19	SB15	93.86	38	33	47	89	1.45	0.31235	4.12726	2.51183	8.73606	54.5958
C19	SB15	94.2	45	31	46	92	1.32391	0.170075	4.12726	2.36054	10.3919	73.7654
C19	CS15	109.95	11	39	56	101	1.46667	0.400424	4.95844	2.2849	0	41.9726
C19	CS15	109.79	9	39	56	101	1.46667	0.33945	6.20522	2.36054	0	51.5574
C19	M14	91.47	6	37	54	103	1.26735	0.251375	5.37403	2.20926	36.1433	39.1536
C19	M14	103.95	6	39	55	94	1.59231	0.346225	4.75065	2.2849	26.2082	42.0353
C19	M15	94.09	8	50	72	136	1.02656	0.264925	3.71167	1.60413	21.2406	40.1559
C19	M15	96.72	8	43	63	118	1.19455	0.23105	4.75065	1.75541	31.1757	52.2779
C19	SB14	86.61	10	31	46	88	1.38571	0.630774	4.54285	3.57081	8.73606	48.2059
C19	SB14	85.8	11	33	47	88	1.41951	0.637549	4.33505	3.04132	18.6712	48.2059
M2	SB15	95.12	137	56	74	127	1.14906	0.461399	4.75065	2.51183	5.42435	48.2059
M2	SB15	93.86	117	47	63	109	1.32391	0.657874	4.75065	2.2849	8.73606	57.7907
M2	CS15	109.27	7	42	62	116	1.22222	0.420749	4.75065	2.43618	11.3055	39.7487
M2	CS15	109.05	8	42	62	121	1.11864	0.3259	5.78963	2.43618	11.3055	38.4958
M2	M14	100.49	6	39	57	103	1.35	0.359775	4.54285	1.67977	26.2082	46.1699
M2	M14	96.7	6	41	60	110	1.242	0.28525	4.12726	2.43618	21.2406	37.2429
M2	M15	93.89	7	51	73	146	0.9	0.2446	3.91946	1.75541	31.1757	36.3032
M2	M15	97.62	7	48	68	132	1.02656	0.2446	5.37403	1.83105	31.1757	44.2905
M2	SB14	87.43	9	38	55	110	1.05818	0.386874	6.82861	3.41953	8.73606	49.8034
M2	SB14	86.54	12	36	51	99	1.2125	0.2717	4.33505	3.41953	3.7685	49.8034
C20	SB15	93.33	27	24	35	72	1.64595	0.305575	4.95844	2.20926	15.3595	72.1679
C20	SB15	94.68	27	24	35	70	1.74	0.2988	4.33505	2.36054	20.327	75.3628
C20	CS15	109.77	8	35	50	96	1.43478	0.474949	5.16624	1.83105	41.1109	43.2882
C20	CS15	110.29	8	36	50	93	1.53488	0.569799	4.75065	2.05798	0	45.4808
C20	M14	92.16	6	34	49	88	1.59231	0.373325	5.16624	1.90669	26.2082	43.3195
C20	M14	103.73	6	36	50	90	1.5525	0.447849	5.58183	2.20926	16.2731	43.2882
C20	M15	93.94	7	40	61	123	1.05968	0.264925	4.54285	1.60413	31.1757	54.1886
C20	M15	95.65	8	41	61	124	1.04286	0.28525	3.91946	1.67977	56.0136	55.4728
C20	SB14	87.05	8	33	47	91	1.32273	0.508824	3.08828	3.72209	18.6712	48.2059
C20	SB14	85.79	8	37	55	96	1.41951	0.502049	5.16624	2.73875	13.7036	48.2059
C21	SB15	94.22	16	33	46	91	1.35333	0.420749	4.54285	2.58747	18.6712	81.7527
C21	SB15	93.72	16	30	44	89	1.35333	0.28525	4.12726	2.51183	10.3919	88.1426
C21	CS15	109.76	9	37	53	97	1.5	0.3259	6.20522	2.51183	0	49.6467
C21	CS15	110.29	9	39	57	104	1.40426	0.393649	5.37403	2.51183	11.3055	42.004
C21	M14	87.18	7	34	50	95	1.38	0.14975	4.12726	2.13362	31.1757	35.99
C21	M14	103.51	7	40	55	94	1.59231	0.441074	4.54285	2.2849	46.0784	43.3195
C21	M15	93.54	9	44	66	128	1.05968	0.183625	4.33505	2.05798	46.0784	48.7697
C21	M15	95.62	8	51	73	135	1.05968	0.28525	3.91946	1.83105	21.2406	39.8427
C21	SB14	86.29	10	32	48	92	1.32273	0.576574	4.12726	3.64645	18.6712	59.0749
C21	SB14	87.88	8	41	59	105	1.26522	0.590124	4.33505	3.49517	18.6712	59.3882
C22	SB15	93.78	123	49	64	110	1.32391	0.373325	4.12726	2.58747	20.327	46.6084
C22	SB15	94.09	128	49	63	107	1.38409	0.359775	4.75065	2.58747	23.6388	48.5191
C22	CS15	110.18	8	47	69	131	1.06452	0.420749	6.20522	2.36054	11.3055	53.4368
C22	CS15	109.74	8	44	65	122	1.15789	0.407199	5.58183	2.43618	26.2082	51.8393
C22	M14	99.7	6	49	71	129	1.07069	0.400424	4.12726	2.36054	60.9811	35.9587
C22	M14	89.89	7	46	68	127	1.05254	0.305575	4.54285	1.90669	115.624	45.5435
C22	M15	94.51	8	54	80	159	0.831646	0.31235	4.54285	1.75541	90.7865	45.2615
C22	M15	96.58	8	55	80	159	0.831646	0.346225	3.50387	1.83105	80.8514	39.1849
C22	SB14	87.2	16	43	61	105	1.32273	0.359775	4.12726	3.79773	36.8856	48.2059
C22	SB14	85.5	11	39	55	94	1.49231	0.183625	4.75065	3.49517	33.5739	46.6084
SB	SB15	94.66	144	49	65	109	1.38409	0.569799	6.20522	2.20926	28.6063	73.7654
SB	SB15	93.35	148	51	67	112	1.35333	0.461399	6.20522	2.2849	25.2946	64.1806
SB	CS15	108.36	14	36	53	91	1.73684	0.705298	7.86759	2.13362	46.0784	51.2442
SB	CS15	108.1	13	37	53	92	1.69231	0.739173	7.0364	2.05798	46.0784	42.3172
SB	M14	97.83	8	36	50	82	1.94063	0.434299	8.90657	1.98233	60.9811	48.7384
SB	M14	85.53	8	38	55	107	1.19423	0.25815	7.2442	1.52848	41.1109	46.5145
SB	M15	92.79	10	43	61	111	1.314	0.170075	6.20522	1.52848	0	39.4981
SB	M15	95.64	11	45	64	114	1.314	0.2446	6.82861	1.45284	31.1757	48.7697
SB	SB14	86.93	16	38	55	88	1.76364	0.305575	7.452	3.41953	21.9829	59.0749
SB	SB14	84.21	13	32	45	84	1.49231	0.305575	7.0364	3.1926	26.9505	54.2825
C23	SB15	94.29	27	33	44	89	1.35333	0.3259	4.95844	2.43618	12.0478	78.5578
C23	SB15	93.12	49	28	42	83	1.48537	0.251375	3.71167	2.51183	10.3919	54.5958
C23	CS15	110.61	8	38	54	95	1.60976	0.33945	4.54285	2.20926	0	41.6594
C23	CS15	109.86	9	40	57	103	1.43478	0.407199	5.78963	2.36054	0	49.6467
C23	M14	102.17	6	36	52	96	1.41136	0.3259	4.75065	2.20926	0	40.4378
C23	M14	87.78	6	40	59	113	1.15	0.23105	3.08828	1.90669	60.9811	48.4252
C23	M15	93.83	9	46	67	127	1.095	0.224275	3.71167	1.60413	31.1757	40.4691
C23	M15	97.63	8	48	69	128	1.11356	0.251375	3.50387	1.67977	0	39.4981
C23	SB14	86.73	9	41	60	97	1.57297	0.427524	5.16624	2.96568	18.6712	43.4135
C23	SB14	85.32	11	37	54	94	1.455	0.319125	3.91946	3.41953	13.7036	43.4135
C24	SB15	93.44	28	29	42	87	1.35333	0.556249	4.54285	2.43618	18.6712	76.9603
C24	SB15	93.32	25	28	41	91	1.218	0.813698	4.95844	2.43618	15.3595	70.5704
C24	CS15	109.26	7	38	55	106	1.29412	0.31235	5.16624	2.36054	26.2082	41.6907
C24	CS15	110.35	7	37	54	102	1.375	0.3259	5.37403	2.36054	0	41.6594
C24	M14	98.23	5	35	50	94	1.41136	0.2175	4.75065	2.2849	31.1757	45.5435
C24	M14	86.76	5	38	56	121	0.955385	0.210725	5.58183	2.20926	16.2731	37.9007
C24	M15	92.45	7	47	70	146	0.864474	0.224275	4.33505	2.05798	11.3055	38.5585
C24	M15	96.19	7	48	70	141	0.925352	0.278475	3.91946	1.52848	0	39.4981
C24	SB14	86.03	8	32	47	94	1.2383	0.725623	4.54285	3.72209	10.3919	57.7907
C24	SB14	86.29	8	40	59	109	1.164	0.420749	4.12726	3.41953	3.7685	49.8034
C25	SB15	94.95	24	25	37	79	1.45	0.644324	4.54285	2.36054	3.7685	78.5578
C25	SB15	94.63	13	36	49	93	1.38409	0.502049	4.12726	2.20926	5.42435	83.3502
C25	CS15	109.89	7	36	52	97	1.46667	0.400424	4.12726	1.52848	16.2731	47.4228
C25	CS15	111.12	8	35	50	94	1.5	0.346225	4.75065	2.05798	16.2731	42.975
C25	M14	91.72	4	34	50	95	1.38	0.170075	4.33505	2.05798	51.046	48.4252
C25	M14	89.16	5	37	54	113	1.05254	0.170075	4.12726	1.90669	26.2082	48.7384
C25	M15	94.45	7	47	69	144	0.876	0.17685	3.71167	1.67977	31.1757	42.3798
C25	M15	96.87	7	46	67	137	0.938571	0.156525	4.95844	1.60413	36.1433	50.9936
C25	SB14	87.07	10	33	47	90	1.35349	0.393649	3.91946	3.49517	8.73606	60.9856
C25	SB14	86.61	7	29	40	80	1.455	0.210725	4.75065	3.57081	7.08021	43.4135
C26	SB15	93	33	34	50	106	1.0875	0.33945	4.54285	2.51183	13.7036	57.7907
C26	SB15	93.37	31	35	50	105	1.10727	0.407199	4.54285	2.43618	20.327	72.1679
C26	CS15	109.23	7	37	54	105	1.29412	0.359775	4.75065	2.43618	0	41.3462
C26	CS15	109.32	7	37	54	105	1.29412	0.332675	5.58183	2.51183	0	51.2442
C26	M14	88.78	5	39	58	117	1.05254	0.210725	3.71167	2.20926	0	37.5561
C26	M14	105.75	5	32	45	85	1.5525	0.2446	4.54285	2.43618	11.3055	39.1223
C26	M15	93.82	7	49	74	159	0.772941	0.25815	4.12726	1.75541	21.2406	38.8717
C26	M15	94.73	6	48	72	153	0.811111	0.237825	3.91946	1.90669	21.2406	39.1849
C26	SB14	92.86	5	34	48	91	1.35349	0.2717	3.71167	3.57081	13.7036	43.4135
C26	SB14	88.25	8	31	43	88	1.29333	0.393649	4.33505	3.26824	15.3595	45.011
C27	SB15	96.31	16	31	44	87	1.41628	0.549474	3.71167	2.20926	13.7036	84.9476
C27	SB15	94.11	20	34	46	92	1.32391	0.393649	4.12726	2.2849	23.6388	84.9476
C27	CS15	111.11	7	36	52	97	1.46667	0.407199	4.75065	2.2849	0	50.2732
C27	CS15	110.29	7	35	50	93	1.53488	0.386874	5.37403	2.43618	0	51.8707
C27	M14	89.35	5	33	49	104	1.12909	0.2175	3.71167	1.98233	21.2406	37.5874
C27	M14	103.4	5	33	47	86	1.59231	0.31235	4.33505	2.36054	11.3055	51.2755
C27	M15	92.34	7	43	65	137	0.9125	0.23105	3.91946	1.83105	46.0784	52.2779
C27	M15	95.89	6	45	66	133	0.980597	0.28525	3.50387	1.83105	0	40.7824
C27	SB14	86.82	6	31	44	88	1.32273	0.36655	3.91946	3.34388	7.08021	52.9983
C27	SB14	86.4	7	30	42	85	1.35349	0.28525	5.37403	3.49517	17.0153	46.6084
C28	SB15	92.13	16	29	42	86	1.38409	0.691748	4.54285	2.36054	17.0153	70.5704
C28	SB15	94.4	20	28	41	85	1.38409	0.400424	4.75065	2.43618	12.0478	67.3755
C28	CS15	109.47	6	38	56	109	1.24528	0.393649	5.16624	2.43618	16.2731	41.3775
C28	CS15	109.25	7	37	56	107	1.29412	0.427524	4.33505	2.2849	26.2082	42.975
C28	M14	86.15	5	36	55	120	0.955385	0.224275	3.08828	1.98233	36.1433	39.8114
C28	M14	103.89	6	38	53	98	1.38	0.386874	3.91946	2.36054	90.7865	46.1699
C28	M15	93.66	7	50	76	157	0.811111	0.237825	4.54285	1.75541	56.0136	53.5621
C28	M15	93.33	7	50	74	154	0.82125	0.264925	3.91946	1.90669	21.2406	43.6641
C28	SB14	86.2	8	37	55	109	1.07778	0.488499	4.33505	3.49517	7.08021	62.5831
C28	SB14	88.27	8	41	61	113	1.11923	0.33945	4.54285	3.57081	13.7036	57.7907
C29	SB15	93.48	30	33	45	88	1.41628	0.434299	5.16624	2.43618	12.0478	60.9856
C29	SB15	93.37	40	30	43	83	1.5225	0.502049	4.75065	2.36054	8.73606	73.7654
C29	CS15	108.96	8	35	51	91	1.65	0.332675	6.20522	2.20926	0	53.1549
C29	CS15	110.35	8	35	49	88	1.69231	0.373325	5.37403	2.20926	21.2406	42.3172
C29	M14	98.85	5	34	49	89	1.5525	0.278475	6.20522	1.90669	16.2731	41.7221
C29	M14	104.85	6	33	46	80	1.82647	0.2988	5.37403	2.13362	26.2082	52.873
C29	M15	93.66	8	43	63	122	1.11356	0.170075	5.37403	1.67977	26.2082	50.9936
C29	M15	97.06	7	46	66	122	1.17321	0.25815	4.75065	1.60413	21.2406	50.6804
C29	SB14	86.25	11	31	44	87	1.35349	0.353	5.78963	3.41953	13.7036	56.1932
C29	SB14	85.55	10	31	45	90	1.29333	0.346225	4.95844	3.26824	17.0153	56.1932
C30	SB15	93.42	28	31	44	93	1.24286	0.332675	4.33505	2.51183	17.0153	68.973
C30	SB15	94.06	25	28	41	85	1.38409	0.393649	4.33505	2.51183	12.0478	56.1932
C30	CS15	109.44	7	37	53	99	1.43478	0.332675	5.16624	2.43618	0	51.8707
C30	CS15	110.44	8	37	54	103	1.34694	0.393649	4.95844	2.20926	0	43.2569
C30	M14	90.56	5	35	50	97	1.32128	0.197175	3.91946	1.98233	51.046	48.4252
C30	M14	104.17	5	33	46	89	1.44419	0.33945	4.33505	2.2849	16.2731	41.3775
C30	M15	93.94	7	49	72	140	0.966176	0.25815	3.50387	1.60413	36.1433	42.3798
C30	M15	96.16	6	44	65	127	1.05968	0.197175	3.50387	1.67977	21.2406	37.9007
C30	SB14	85.8	7	31	45	89	1.32273	0.773048	5.78963	3.87338	18.6712	54.5958
C30	SB14	88.05	7	32	45	87	1.38571	0.413974	4.12726	3.57081	8.73606	51.4008
C31	SB15	93.97	47	27	42	89	1.29574	0.28525	3.91946	2.51183	5.42435	54.5958
C31	SB15	93.55	46	29	45	94	1.24286	0.278475	4.33505	2.51183	8.73606	52.9983
C31	CS15	109.78	7	35	50	91	1.60976	0.3259	6.20522	2.2849	0	49.96
C31	CS15	110.14	8	36	52	97	1.46667	0.332675	5.58183	2.36054	26.2082	36.8983
C31	M14	90.14	6	33	48	89	1.51463	0.210725	3.91946	2.13362	21.2406	36.3032
C31	M14	103.74	5	37	52	92	1.5525	0.31235	4.75065	2.2849	0	48.0806
C31	M15	92.59	9	45	67	135	0.966176	0.210725	4.75065	1.90669	60.9811	47.4855
C31	M15	94.89	8	43	64	124	1.095	0.17685	4.95844	1.90669	60.9811	46.2012
C31	SB14	87.02	25	44	63	110	1.2383	0.759498	4.33505	3.72209	21.9829	54.5958
C31	SB14	86.44	24	32	46	83	1.57297	0.319125	4.54285	3.57081	12.0478	49.8034
