# Supplementary material for: Wine yeast phenomics: A standardized fermentation method for assessing quantitative traits of Saccharomyces cerevisiae strains in enological conditions
Source: PLoS One. 2018 Jan 19;13(1):e0190094. doi: 10.1371/journal.pone.0190094 (PMC5774694; doi:10.1371/journal.pone.0190094)
Supplement: S9 Table — (XLSX) [file pone.0190094.s013.xlsx]

## Sheet: Sheet1
Strain	Must	CO2max	lp	t35	t50	t80	V50_80	Acetic acid	Glycerol	Malic acid	Pyruvate	SO2
C1	CS15	1.58430636975307	0.0186787187796627	-0.0156285210312569	-0.124834181293163	-0.381464627476542	0.436468829430376	-1.75692932439538	0.608376960865522	-0.65925200643037	-0.326648334797737	0.0897151868109917
C2	CS15	-0.250277906399149	-0.635076438508533	-0.197961266395914	-0.33796571033027	-0.166814113623182	-0.0995775519314373	0.790913309124023	-1.28759233536709	0.612533359321929	0.515760528533653	0.0326237041902549
C3	CS15	-1.18409783074689	0.672433876067858	0.896035205792027	0.62112617033671	0.648857839019586	-0.725100546194485	-1.1027535093092	0.608376960865522	0.975900606336601	-0.720879083491067	-0.24682407714429
C4	CS15	0.162916750391889	2.63369934793244	-2.02128872004248	-1.72332064907146	-1.88401822445006	2.57483556756045	0.584331474385854	0.900064545063276	-1.5676701227661	-0.720879083491067	1.68226705499223
C5	CS15	0.551319727775464	0.0186787187796627	-0.562626757125227	-0.33796571033027	-0.596115141329902	0.700044141694959	0.377749639647685	-1.43343612711504	-0.295884757013799	0.669303030768522	0.462312226991545
C6	CS15	-0.208958440720035	-0.308198859864435	-0.0156285210312569	-0.0182684167746098	0.562997633478242	-0.951269045685704	1.3762285177128	0.316689376667768	1.52095147805956	0.308270660596313	-0.583363340140268
C7	CS15	0.29513904056503	0.34555629742376	0.71370246042737	0.62112617033671	0.262486914083538	-0.165239059637403	-0.241995864566823	-0.995904751169336	0.430849737015542	-0.0859600880970174	-0.706560748238929
C8	CS15	-0.704792028869288	0.34555629742376	0.71370246042737	0.62112617033671	0.605927736248914	-0.675956845015677	-0.861741368781331	-0.412529582773828	-0.295884759415698	2.47446488041827	0.801856304912789
C9	CS15	-0.663472563190175	0.34555629742376	-1.1096249932192	-0.97736029744159	-0.76783555241259	0.514762889914018	0.308889028068295	-0.412529583475688	-0.295884759415698	-0.720879083491067	-0.000429259028359441
C10	CS15	-0.0519444711394428	0.0186787187796627	-0.197961266395914	-0.231399945811716	-0.12388401085251	-0.0995775519314373	0.171167804909515	-0.412529582773828	-0.295884759415698	-0.0527617093336373	0.0296188892649898
C11	CS15	1.3198617894068	0.34555629742376	-1.29195773858385	-1.4036233555158	-1.58350750505536	2.04602717805558	0.446610251227074	0.608376960865522	-1.38598650045971	0.395416405304422	0.45930741206628
C12	CS15	0.609166979726216	0.0186787187796627	-0.927292247854541	-0.97736029744159	-0.596115141329902	0.190128980098918	-0.99946259194011	-0.704217166971582	-0.114201134707413	-0.720879083491067	-0.367016670317687
C13	CS15	-0.085000043682731	-0.308198859864435	0.1667042243334	0.194863112262497	0.348347119624882	-0.557403532748896	0.0334465817507359	0.754220753315329	-0.659252004028471	-0.720879083491067	0.155821113248221
F15	CS15	-0.134583402497657	0.34555629742376	0.349036969698057	0.194863112262497	0.00490629745950596	0.0069102268179187	0.89420423157509	1.77512729695468	-0.295884757013799	-0.446992458026967	0.762793711843644
C14	CS15	-0.085000043682731	-0.308198859864435	-0.0156285210312569	-0.231399945811716	-0.381464627476542	0.346717101066203	-0.689589839832856	0.170845584919821	-0.65925200643037	-0.206304211326247	0.0296188892649898
C15	CS15	-1.01881996803047	-0.308198859864435	-0.38029401176057	-0.231399945811716	0.691787941790258	-1.20115494585721	1.44508912421021	0.316689376667768	0.067482487598973	-0.446992458026967	0.36916296622693
C16	CS15	0.138125070984438	0.0186787187796627	0.349036969698057	0.407994641299603	0.30541701685421	-0.346773817292452	0.171167804909515	-0.558373375223635	0.0674824875989741	-0.326648334797737	1.74536816650419
C17	CS15	0.262083468021742	-0.635076438508533	-0.927292247854541	-0.870794532923036	-0.76783555241259	0.596785237709589	1.23850728947204	0.170845584919821	0.430849734613645	-0.720879083491067	-0.000429259028359441
GN	CS15	-1.49812576990808	-0.961954017152631	1.80769893261531	2.64587569618922	3.13880379971856	-2.33044075174161	-0.99946259194011	0.754220752613469	2.61105321910357	3.19652962027817	-0.457161116157037
C18	CS15	0.361250185651595	1.32618903335605	-1.1096249932192	-1.1904918264787	-1.41178709397267	1.80398083301923	-0.861741368781331	-0.266685791025881	-0.840935628736756	0.909991277226982	-0.397064819570339
C19	CS15	0.187708429799364	0.999311454711956	0.71370246042737	0.514560405818157	0.09076650300085	0.0405003329701665	-0.345286781935908	0.170845584919821	0.249166112307258	-0.720879083491067	-0.0635303714996263
M2	CS15	-0.985764395487197	-0.635076438508533	1.80769893261531	1.7933495800408	1.59332009997437	-1.28925031425869	-0.310856476146213	-0.266685791025881	0.794216981628316	-0.173105832562867	-1.52988001569763
C20	CS15	0.452153010145623	-0.308198859864435	-0.562626757125227	-0.764228768404483	-0.467324833017886	0.12204718934985	1.20407698368234	-0.704217166971582	-1.5676701227661	0.275072281832933	-0.520262227669001
C21	CS15	0.44388911700981	0.34555629742376	0.349036969698057	0.30142887678105	0.047836400230178	-0.0247632283670617	-0.448577699304993	0.462533169117575	1.15758423104489	-0.446992458026967	-0.243819262219025
C22	CS15	0.336458506244132	-0.308198859864435	3.08402815016791	2.85900722522633	2.28020174430512	-1.55511518949008	0.102307193330126	0.608376960865522	0.612533359321929	0.187926537367083	1.06327519573644
SB	CS15	-2.52284851874986	3.28745450522064	-0.197961266395914	-0.124834181293163	-0.724905449641918	1.15332554284121	3.23546503035632	2.79603384129589	-0.840935628736756	1.51171189409991	-0.0605255556150573
C23	CS15	0.790972628714271	0.0186787187796627	0.71370246042737	0.407994641299603	-0.0809539080818381	0.290092978197665	-0.310856476146213	-0.412529582773828	0.0674824900008716	-0.720879083491067	-0.276872225437639
C24	CS15	0.0802778190336865	-0.961954017152631	0.1667042243334	0.194863112262497	0.348347119624882	-0.552513209900021	-0.861741368781331	-0.266685791025881	0.430849737015542	-0.0859600880970174	-1.04009519630964
C25	CS15	1.2372228580486	-0.635076438508533	-0.562626757125227	-0.551097239367376	-0.381464627476542	0.115314656534542	-0.310856476146213	-1.43343612711504	-2.29440461679544	0.0675824138955928	-0.364011855392421
C26	CS15	-0.795694853363316	-0.961954017152631	-0.0156285210312569	0.0882973477439435	0.434207325166226	-0.73404796755507	-0.586298922463772	-0.412529583475688	0.975900606336601	-0.720879083491067	-0.153674816379674
C27	CS15	1.55951469034561	-0.961954017152631	-0.562626757125227	-0.551097239367376	-0.424394730247214	0.193608717018185	-0.0698443356183488	-0.558373375223635	0.430849734613645	-0.720879083491067	0.762793711843644
C28	CS15	-0.655208670054362	-1.28883159579673	0.1667042243334	0.514560405818157	0.691787941790258	-0.843653858461267	0.0678768875404307	-0.995904751169336	0.430849734613645	0.308270660596313	-0.94394112061976
C29	CS15	-0.167638975040946	-0.308198859864435	-0.744959502489884	-0.764228768404483	-0.896625860724606	0.958414540617651	-0.517438310884382	0.462533169117575	-0.295884757013799	-0.206304211326247	0.122768150029607
C30	CS15	0.303402933700844	-0.635076438508533	-0.0156285210312569	-0.0182684167746098	0.09076650300085	-0.299782032694005	-0.414147393515298	-0.558373375223635	0.249166112307258	-0.720879083491067	0.0897151858516885
C31	CS15	0.336458506244132	-0.635076438508533	-0.562626757125227	-0.551097239367376	-0.510254935788558	0.361654505866	-0.758450451412246	0.608376960865522	0.249166112307258	-0.0859600880970174	-0.703555933313663
C1	M14	0.095953698319761	-0.312409903190356	0.47538110655921	0.378419775651856	-0.0254555241052505	0.196810729327932	0.092553269272657	-0.271297955668444	-0.48027793413451	-0.201448735285994	-0.874834171869358
C2	M14	-1.2572500972251	-0.312409903190356	-0.248024925161326	0.0966178150600481	0.865487819578537	-1.20150365356032	-0.370213084409045	-0.606430724403722	-0.65180576662016	1.19629859391651	1.04808019704227
C3	M14	0.0524889083129663	0.295053797457558	0.909424725591531	0.660221736243664	0.129491144361495	0.23195636264601	-1.41143738588498	0.398967581802112	0.377361232829011	-0.401126925459184	-0.454490737080954
C4	M14	-0.0648660247053783	0.598785647781516	-0.971430956881861	-1.21845800103506	-1.41997554030596	1.71625708838779	-0.0231383191477686	-0.271297955668444	-1.6809727706046	-0.101609640601363	0.474029089317752
C5	M14	-0.0192279951982437	-0.00867805286639875	-0.826749750537754	-0.748788066715376	-0.683978865088919	0.483206415411462	-0.177393770375002	-0.494719801671163	0.034305567857712	0.197907644256457	0.436386393680006
C6	M14	-0.316961806744784	3.63610415102109	1.77751196365617	1.50562761801909	1.60148449479558	-1.34852010549797	1.94361869538367	0.510678505072271	0.891944734821234	1.79533316363216	-0.42312182421641
C7	M14	0.589279064896874	-0.00867805286639875	-0.103343718817218	-0.279118132395696	-0.490295529505487	0.465148828831668	0.362500314612419	0.0638348130668339	0.205833400343362	-0.201448735486976	-0.457627628467555
C8	M14	0.509593616551085	0.295053797457558	-0.392706131505433	-0.560920092987504	-0.645242197972233	0.526081210752936	-1.0643626206237	0.622389427804831	0.891944734821233	1.99501135280043	1.04808019704227
C9	M14	0.431356994538855	0.295053797457558	-1.26079336957008	-1.40632597476293	-1.14881887048916	0.895415227261484	0.671011217066887	-0.383008878401004	0.377361235096647	-0.401126925258202	-0.808959454753671
C10	M14	0.645783291905706	-0.312409903190356	-0.248024925161326	-0.466986106123568	-0.490295529505487	0.361176949391977	0.246808726191994	0.0638348130668339	0.205833400343362	-0.728186029547282	0.436386392678536
C11	M14	0.00974853147295274	-0.00867805286639875	-0.392706131505433	-0.560920092987504	-0.683978865088919	0.60524391548947	0.285372588998802	-0.494719801671163	-0.823333601373446	-0.700644210116023	-0.231771453639611
C12	M14	-0.361151009918358	-0.312409903190356	-0.248024925161326	-0.0912501586678239	0.168227811478181	-0.356017506838867	-0.717287849670321	-0.941563493139001	-0.48027793413451	-0.301287830372589	0.37364856694945
C13	M14	-0.287260866906808	-0.312409903190356	-0.103343718817218	-0.0912501586678239	0.245701145711554	-0.432060499151839	-0.177393770375002	-1.16498533914172	-0.651805768887797	0.597264024200873	-0.61447219379174
F15	M14	0.244458397509641	-0.00867805286639875	-0.103343718817218	-0.279118132395696	-0.56776886373886	0.60524391548947	0.169681000578377	0.0638348130668341	-0.137222266895575	-0.428668744689461	0.947699675675439
C14	M14	0.0249612079753302	-0.00867805286639875	-0.103343718817218	-0.0912501586678239	-0.219138859688683	0.141564905732549	-0.100266044761386	-0.718141647673881	0.205833400343362	-0.700644210317005	-0.263140367505624
C15	M14	0.260395487178799	-0.312409903190356	0.186018693870996	0.0966178150600481	0.323174479944927	-0.521288773538506	0.478191903032845	0.0638348130668339	0.548889067582297	-0.00177054551476846	-0.620745976564942
C16	M14	0.786319446261008	-0.00867805286639875	-0.53738733784954	-0.65485407985144	-0.877662200672351	0.926366057887718	0.632447354260078	-0.383008878401004	0.205833400343362	-0.101609640601363	1.81348167634506
C17	M14	-0.0511021745365603	-0.616141753514313	-0.248024925161326	-0.373052119259632	-0.0254555241052506	-0.106434077752514	0.555319628646462	0.398967581802112	0.034305567857712	0.597264024401855	-0.297646171756769
GN	M14	0.228521307840482	-0.616141753514313	0.764743519247424	1.41169363115515	1.87264116461238	-1.62125351313526	-0.871543306589658	0.398967581802112	2.43569523853026	0.297746739343052	-0.137664716047452
C18	M14	-0.449529416265507	0.295053797457558	-0.392706131505433	-0.466986106123568	-0.451558862388801	0.377357250926	-1.0643626206237	-0.606430724941322	-0.994861436126732	0.896781309058694	0.408154371200595
C19	M14	0.187954170500808	-0.00867805286639875	0.47538110655921	0.472353762515792	0.0520178101281222	0.113481565819382	0.169681000578377	0.62238942780483	0.548889067582298	-0.301287830372589	-0.648977998042884
M2	M14	0.316175301020851	-0.00867805286639875	1.05410593193564	1.22382565742728	0.671804483995105	-0.41878402057078	0.439628040226036	-0.159587032398286	-0.308750101648861	-0.60080511523041	-0.426258715603011
C20	M14	0.222001589339464	-0.00867805286639875	-0.392706131505433	-0.466986106123568	-0.683978865088919	0.680545026134084	1.44228847320306	0.957522196540109	-0.308750099381224	-0.700644210317005	-0.106295802181439
C21	M14	-0.154693257386085	0.598785647781516	0.186018693870996	0.0966178150600481	-0.257875526805369	0.337506636290932	0.131117132079466	-0.159587032398286	0.377361232829012	-0.00177054551476852	-0.837191476231613
C22	M14	-0.234378705731875	0.295053797457558	3.22432402709724	3.29037336843387	2.33748117001262	-1.35098929781669	0.786702805487313	-0.159587032398286	0.0343055678577115	1.99501135460927	-0.617609085178341
SB	M14	-0.685688108635754	1.20624934842943	0.186018693870996	0.0966178150600481	-0.257875526805369	0.66075434994995	0.709575079873696	3.86200619242505	-1.6809727706046	0.49742492931526	0.75948619748671
C23	M14	-0.208299831727798	-0.00867805286639875	0.47538110655921	0.660221736243664	0.516857815528359	-0.479708362467643	-0.061702181954577	-0.606430724403723	-0.308750099381224	-0.328829649602866	0.119560370643565
C24	M14	-0.567608762450629	-0.616141753514313	0.0413374875268886	0.190551801923984	0.749277818228477	-0.866726033824774	-0.794415580976041	0.73410035053739	0.548889067582298	-0.600805115431392	-0.423121824216411
C25	M14	-0.86534257399717	-0.91987360383827	-0.248024925161326	0.00268382819611213	0.478121148411673	-0.73588597775507	-1.29574579746455	-0.271297955668444	-0.65180576662016	-0.00177054551476846	0.95083656706204
C26	M14	0.123481398657397	-0.616141753514313	-0.248024925161326	-0.0912501586678239	0.245701145711554	-0.392847587911918	-0.640160129748807	-0.383008878401004	0.891944734821234	-1.32722059926292	-1.10069034569583
C27	M14	-0.00546414502942572	-0.616141753514313	-0.971430956881861	-0.748788066715376	-0.219138859688683	-0.161458294570801	-0.215957633181811	-0.494719801671163	0.205833400343361	-0.90032240008823	0.119560371645035
C28	M14	-0.201780113226779	-0.312409903190356	0.186018693870996	0.378419775651856	0.865487819578537	-0.929096649436755	0.246808720499891	-1.05327441640916	0.205833400343361	0.996620404145288	-0.169033628911995
C29	M14	0.787768272594566	-0.312409903190356	-0.826749750537754	-0.842722053579312	-1.0326088691391	1.14620799891582	0.0539894121579516	1.40436588854555	-0.48027793413451	-0.700644210317005	0.693611480371023
C30	M14	0.137969661992995	-0.616141753514313	-0.682068544193647	-0.748788066715376	-0.374085528155428	-0.0738312915698676	-0.177393770375002	-0.383008878938603	0.0343055655900757	-0.201448735486976	0.213667110238664
C31	M14	0.0763945428167028	-0.312409903190356	-0.392706131505433	-0.373052119259632	-0.56776886373886	0.526081210752936	-0.254521495988619	-0.159587032935885	0.377361232829012	-1.12754240929072	-0.329015085622781
C1	M15	-0.323027590910967	0.680684874978628	-0.495835995855994	-0.39842925129887	-0.397720754828647	0.2870632253256	-1.07540406787219	-0.844481705089037	-0.495226893157366	0.294871328975669	-0.654272469892672
C2	M15	-0.32621416522942	-0.218332884427107	-0.495835995855994	-0.473001571060691	-0.186408019815324	-0.0980945077918348	1.24726452993585	-0.534985792712658	1.0406033467677	-0.119376974083623	-0.0185499579537333
C3	M15	-0.386759077280093	0.680684874978628	0.324973591878591	0.123576987033873	-0.133579836061994	0.111357797420097	-2.74296099726593	1.16724172908098	0.601794705131642	-0.119376973875147	-0.0753592035177123
C4	M15	-0.0362359022498797	2.92822927349296	-2.37197219639219	-2.18816492558256	-2.06180854305856	2.99254335912665	-0.18206999855412	0.238753989717713	-2.03105712728129	0.398433404844731	-0.24037653656937
C5	M15	-0.32621416522942	0.23117599527576	-1.19938707105707	-1.06958012915525	-1.08448714362194	1.21981141296937	0.0561524199306999	-1.9277174006405	-0.056418254421878	0.709119631826485	1.71548463978283
C6	M15	-0.456863712286136	-0.667841764129974	-0.378577483322482	-0.249284611775229	0.658842920237965	-1.13123181011219	0.889930902208621	0.857745815959893	0.821199025949674	1.74474038822386	-0.846341824600337
C7	M15	0.0752941988961007	0.680684874978628	-0.378577483322482	-0.249284611775229	-0.476963030458642	0.507432854752937	0.234819242584841	-0.534985791967947	-0.495226893157366	-0.326501125404793	-0.600168426580658
C8	M15	0.129465962309857	0.23117599527576	-0.144060458255458	-0.32385693153705	-0.159993927938659	-0.10901183200724	-0.896737254008579	0.238753989717713	-0.934035531892854	1.4340541612421	1.74794706680642
C9	M15	0.346153015964906	-0.667841764129974	0.442232104412103	0.198149306795693	-0.080751652308663	0.0858209415591895	1.30682013455706	-0.844481705089037	-0.495226893157366	-0.637187352595024	-0.68132449241233
C10	M15	0.400324779378663	-0.667841764129974	0.0904565668115667	0.123576987033873	-0.107165744185328	0.064440392445245	0.830375297587416	-0.225489879591567	-0.934035531892854	-0.769318276871856	-0.489255137704665
C11	M15	-0.125459983166658	0.680684874978628	-0.730353020923019	-0.845863169869793	-1.00524486799195	1.19024744244899	0.35393045182725	-0.225489879591567	-1.37284417062834	0.191309253315084	0.476502042064891
C12	M15	0.438563671200138	-0.667841764129974	-0.378577483322482	-0.100139972251588	-0.0279234685553324	-0.191793073902394	-0.598959230902554	-0.380237836524468	0.162986066396154	-1.18356657972267	0.254675462585603
C13	M15	0.317473847098797	-0.667841764129974	0.0904565668115667	0.0490046672720525	0.18338926645799	-0.425730670530271	-0.479848021660144	-0.380237835779757	-0.495226893157366	0.191309253315084	0.284432686493575
F15	M15	1.33080448036796	0.23117599527576	0.676749129479128	0.421866266081155	0.156975174581325	-0.191793073902394	0.175263637963636	-0.0707419234033777	0.601794705131642	-0.947873579785255	-0.849047027715953
C14	M15	-0.58114011070594	-0.218332884427107	-0.495835995855994	-0.39842925129887	-0.318478479198651	0.125947947217166	-1.01584846325099	-0.0707419226586664	-0.495226893157366	0.709119631826485	0.281727484241609
C15	M15	-0.147766003395856	-0.667841764129974	0.676749129479128	0.645583225366616	1.13429657401794	-1.28439126473214	1.8428205761479	-0.0707419234033777	0.162986063495579	0.501995480505316	-0.873393847119994
C16	M15	0.0402418813930793	-0.667841764129974	-0.144060458255458	-0.249284611775229	-0.318478479198651	0.209963869533533	0.353930451827251	-0.534985791967947	-0.056418254421878	0.6055575561659	1.58022453063914
C17	M15	-0.57158038775057	0.23117599527576	-0.847611533456531	-0.696718530346152	-0.503377122335308	0.261817063139885	0.711264088345007	0.857745815959893	0.601794705131643	0.0877471776544995	1.02565808366823
GN	M15	-0.217870638401898	-0.667841764129974	2.78740235508235	3.55390369607761	3.80211985356113	-2.45607729188777	-0.42029241703894	-0.844481705089037	2.79583790170966	2.05542661645647	-0.543359181016679
C18	M15	0.55646692098303	0.680684874978628	-0.964870045990043	-1.06958012915525	-1.19014351112861	1.47460902276507	-1.79007132332665	0.238753990462423	-0.056418254421878	-0.740749428464085	-0.435151093529001
C19	M15	0.374832184831011	0.23117599527576	0.207715079345079	0.0490046672720525	-0.318478479198651	0.428690065415935	0.234819242584841	0.0840060335295224	-0.275822575239909	-0.533625276934439	0.200571418409938
M2	M15	0.597892387122968	-0.667841764129974	0.911266154546152	0.496438585842975	0.315459725841316	-0.366814109188884	0.175263629173109	0.702997859026992	0.382390384313611	-0.326501125613269	-0.821995006059946
C20	M15	-0.0139298820206818	-0.218332884427107	-1.19938707105707	-0.920435489631614	-0.503377122335308	0.108448732448981	0.711264088345006	0.0840060335295227	-0.495226893157366	0.191309253106608	1.68843261812682
C21	M15	-0.150952577714309	0.680684874978628	0.442232104412103	0.347293946319334	-0.080751652308663	0.153876694581363	-0.00340317589997863	-0.0707419234033777	1.26000766468516	-0.222939049535731	-0.129463246829726
C22	M15	0.464056265747794	0.23117599527576	2.08385127988127	1.91331266131756	1.37202340090793	-1.07785365292887	1.66415376228429	-0.225489878846857	0.382390384313611	1.95186454079589	-0.489255136841015
SB	M15	-0.383572502961635	2.4787203937901	-0.378577483322482	-0.696718530346152	-1.08448714362194	1.52761831202898	-0.479848021660144	3.48846107637209	-1.37284417062834	-0.976442428401502	-0.159220470737699
C23	M15	0.581959515530681	0.680684874978628	0.324973591878591	0.123576987033873	-0.292064387321985	0.394798895928753	0.0561524287212262	-0.844481705089037	-0.495226893157366	-0.976442428401502	-0.87609904937196
C24	M15	-0.316654442274051	-0.667841764129974	0.442232104412103	0.421866266081155	0.553186552731304	-0.736110651409164	0.294374847206046	-0.0707419234033777	0.382390387214185	-1.39069073125232	-1.04111638242362
C25	M15	0.537347475072295	-0.667841764129974	0.207715079345079	0.123576987033873	0.394702001471312	-0.669278000539591	-1.1945152771146	0.238753989717713	-0.495226893157366	-0.222939049744208	0.28172748424161
C26	M15	-0.34533361114016	-1.11735064383284	0.676749129479128	0.869300184652078	1.21353884964794	-1.29186081984441	0.234819242584841	-0.225489879591567	0.601794705131642	-0.740749428255609	-1.04111638155997
C27	M15	-0.447303989330766	-1.11735064383284	-0.378577483322482	-0.249284611775229	0.104146990827994	-0.457197214990584	0.413486056448456	-0.689733748900847	0.601794705131643	-0.665756201002794	0.254675462585603
C28	M15	-0.842439204819376	-0.667841764129974	1.02852466707966	1.16758946369936	1.18712475777127	-1.16138903523565	0.294374847206046	0.0840060335295227	0.601794705131642	-0.0158148982145618	0.614467352596891
C29	M15	0.346153015964902	-0.218332884427107	-0.26131897078897	-0.39842925129887	-0.582619397965304	0.606038926866373	-0.360736803627208	1.32198968526917	-0.495226893157366	-0.637187352595024	0.99860606201222
C30	M15	0.148585408220597	-1.11735064383284	0.207715079345079	0.198149306795693	0.0249047151979981	-0.0986493356149201	-0.122514385142389	-0.999229661277227	-0.495226893157366	-0.430063201065378	-0.849047027715953
C31	M15	-0.686297063215004	0.680684874978628	-0.378577483322482	-0.249284611775229	-0.186408019815324	-0.00325061135581792	-0.718070440144964	1.01249377214808	1.0406033467677	0.916243783564608	0.308779505897616
C1	SB14	0.208750322258486	0.109525465250085	-0.770010733549807	-0.606650715472454	-0.466219143663707	0.0431123392975415	-0.414858188814733	-0.303120035535555	0.164352430584752	-0.587312059241898	0.0884458977385257
C2	SB14	0.146389612002304	-0.766678256750595	-0.503175330834527	-0.524670889057257	0.347122664596965	-1.10169015764053	-1.04815940799033	1.12587441802579	0.331121810720719	-0.085977641619142	-0.0290753174932419
C3	SB14	0.0578776361548179	3.50481488800272	0.297330877311311	0.0491878958491173	-0.364551417631123	0.691228450153433	-1.78701082984254	-0.0433028619902643	0.831429946719165	-1.08864647656189	-1.90941475973017
C4	SB14	-0.169437210908048	0.43810186100034	-0.369757629476887	-0.442691062642061	-0.872890047794043	1.12195222926098	0.366213310992242	0.476331484475145	-0.6694944634809	0.164689566939932	0.558530757929923
C5	SB14	0.18058742085247	-0.65715279150051	-0.636593032192167	-0.606650715472454	-0.364551417631123	-0.142882020734985	-0.0770975402495543	-0.822754382626138	0.497891188651958	-0.169533378141905	0.323488327466388
C6	SB14	0.0598892719695317	-0.43810186100034	0.430748578668951	0.459087027925099	0.804627431743593	-0.951733853265446	0.577313719461363	0.0866057244697949	0.497891188651958	1.33446987472636	-1.08676625384348
C7	SB14	-0.455089496597664	0.65715279150051	0.0304954745960318	0.21314754867951	-0.161215965565955	0.442667891179523	0.55620367892604	-0.173211449075496	1.1649687069911	-0.0859776416191421	-0.26411774869245
C8	SB14	-0.272030637458542	-0.43810186100034	0.697583981384231	0.787006333585885	0.652125842694717	-0.403537413625871	0.112892827684243	-0.822754382626138	0.16435243278948	2.58780591802634	0.441009541962482
C9	SB14	0.0639125435989649	-0.65715279150051	-0.636593032192167	-0.852590194718043	-0.822056184777751	0.473836118405093	-0.0559874997142306	-0.173211448450323	-0.6694944634809	0.582468248544532	1.02861561738565
C10	SB14	-0.282088816532122	-0.766678256750595	0.297330877311311	0.295127375094706	0.499624253645841	-0.646003975117904	-0.668178675238617	-0.173211448450323	-0.00241694734648709	-0.503756322719134	-0.969245038611709
C11	SB14	-0.545613108259867	0.21905093050017	-0.102922226761608	-0.114771756981275	-0.669554595728875	1.1350112500402	0.767304084279276	0.346422898015086	-1.16980260168408	-0.253089114160061	0.441009541962482
C12	SB14	-0.0185645248043742	0.21905093050017	-0.369757629476887	-0.442691062642061	-0.364551417631123	0.0520797359970862	-0.351528067208762	-1.08257155617143	-0.169186327482454	-0.420200586700979	-0.499160178420312
C13	SB14	-0.253925915126101	-0.547627326250425	-0.636593032192167	-0.606650715472454	-0.364551417631123	-0.13451948429023	0.218443027244977	-0.303120035535555	-0.836263841412139	1.2509141382036	1.26365804784918
F15	SB14	-0.308240082123421	-0.328576395750255	0.0304954745960319	0.0491878958491173	0.042119486499213	-0.142882020734985	-0.267087905067467	-0.303120035535555	0.164352430584752	-0.754423531782816	-0.616681392916406
C14	SB14	0.442100076765498	-0.21905093050017	-0.503175330834527	-0.442691062642061	-0.771222321761459	0.895822245303342	1.2528350197076	-0.433028622620788	-1.67011073768252	-0.336644850682824	0.0884458977385257
C15	SB14	-0.0809252350605614	0.547627326250425	-0.636593032192167	-0.606650715472454	-0.059548239533371	-0.632275818306367	-0.119317621320201	0.346422897389913	0.664660568787926	-0.25308911416006	-1.20428746907524
C16	SB14	-0.175472118352195	-0.766678256750595	-0.503175330834527	-0.606650715472454	-0.262883691598539	-0.297033705242255	-0.752618837379911	-0.692845795540906	-0.502725083344933	-0.0859776416191421	1.49870047757704
C17	SB14	3.54404250305696	-0.547627326250425	-0.770010733549807	-0.770610368302846	-1.22872708890809	1.77502261263429	-0.034877459178907	-0.692845795540905	1.49850746505831	1.00024692913992	-1.0867662531078
GN	SB14	-0.308240082123424	-0.65715279150051	0.96441938409951	1.44284494490746	2.58381263731381	-2.30249584690754	0.218443030360861	0.995965831565728	0.998199326855132	2.25358297344911	0.67605197316169
C18	SB14	-0.215704834646504	-0.109525465250085	-0.770010733549807	-0.852590194718043	-1.27956095192438	1.50223088576775	0.61953380053201	1.12587441802579	-0.502725083344933	1.16735840218544	-0.381638963188544
C19	SB14	-0.336402983529443	0.109525465250085	-0.503175330834527	-0.360711236226865	-0.415385280647415	0.238074096029613	1.3372751818489	-0.303120035535555	-0.669494463480901	-0.503756322719134	-0.381638963188544
M2	SB14	-0.0225877964338047	0.109525465250085	0.83100168274187	0.705026507170688	1.26213219889022	-1.34038291864876	-0.562628472561998	1.12587441802579	-0.169186327482454	-1.25575794905235	-0.146596532725009
C20	SB14	-0.24990264349667	-0.43810186100034	0.297330877311311	0.377107201509903	0.143787212531797	0.0520797359970862	0.535093635274832	-0.692845795540906	-1.00303322375284	-0.253089114160061	-0.381638963188544
C21	SB14	0.0176449198605052	-0.21905093050017	0.697583981384231	0.787006333585885	0.652125842694717	-0.403537413625871	1.02062457381904	-0.562937209080846	0.497891190856687	-0.00242190509637884	1.24061467247222
C22	SB14	-0.278065544902689	0.766678256750595	1.89834329360299	1.52482477132265	0.753793568727301	0.267037569888411	-0.921499164778385	-0.303120035535555	0.831429948923893	1.6686928198082	-0.499160178420311
SB	SB14	-0.591880731998324	0.985729187250765	0.297330877311311	0.21314754867951	-0.618720732712583	1.5689980901161	-0.710398756309264	3.20441180513777	-0.6694944634809	0.582468248544532	0.865007651399947
C23	SB14	-0.408821872859204	0	1.36467248817243	1.36086511849226	0.347122664596965	0.895822245303342	-0.288197945602791	-0.173211449075496	-1.16980260168407	-0.253089114160061	-1.0867662531078
C24	SB14	-0.354507705861881	-0.43810186100034	0.564166280026591	0.705026507170688	0.957129020792469	-0.951733853265446	0.957294449097189	-0.433028621995614	0.497891188651959	-1.17220221303419	0.441009542698155
C25	SB14	-0.0809252350605614	-0.328576395750255	-0.770010733549807	-0.852590194718043	-0.720388458745167	0.247706134447451	-0.731508799960472	-0.433028622620788	0.331121810720719	-1.08864647656189	0.20596711223462
C26	SB14	1.41372017527314	-0.766678256750595	-0.369757629476887	-0.524670889057257	-0.262883691598539	-0.229679390521904	-0.541518432026675	-0.822754382626138	-0.169186327482455	-0.420200586700979	-0.969245038611709
C27	SB14	-0.173460482537478	-0.766678256750595	-0.903428434907446	-0.934570021133239	-0.567886869696291	-0.142882020734985	-0.583738513097322	-0.0433028626154378	-0.169186325277726	-0.670867795461896	-0.146596533460682
C28	SB14	0.0779939943019728	-0.43810186100034	1.36467248817243	1.52482477132265	1.92297241810202	-1.55793273151491	-0.034877459178907	-0.303120035535555	0.331121810720719	-0.837979268002814	1.38117926308095
C29	SB14	-0.459112768227094	0.109525465250085	-0.770010733549807	-0.68863054188765	-0.364551417631123	-0.229679390521904	-0.435968229350056	0.866057244480495	-0.502725085549661	-0.336644850682824	0.793573187657784
C30	SB14	-0.0467274262103957	-0.65715279150051	-0.636593032192167	-0.606650715472454	-0.415385280647415	-0.047722114503311	1.08395469230913	0.346422898015086	1.1649687069911	-0.503756322719134	0.323488327466388
C31	SB14	-0.125181222984304	3.17623849225246	1.09783708545715	0.950965986416277	0.448790390629549	0.255922499381962	0.746194043743952	-0.303120035535555	0.831429946719165	-0.169533377637297	0.20596711223462
C1	SB15	0.236942529438318	0.158988565405881	-0.411374767493978	-0.127623490010767	0.158692338455144	-0.605646541878119	-0.638840700582774	0.194282105492952	-0.198001229171018	-0.496766730038695	-0.945460478208329
C2	SB15	0.169290905595957	-0.45528543729866	-0.260349510386599	-0.323442738042555	-0.0628157173051608	-0.390534475136218	-0.366844400869365	-1.10740800266709	0.889382570751803	-0.330120018354777	-0.809784924010655
C4	SB15	0.1851518126212	-0.240289536352071	-0.411374767493978	-0.649808151428868	-0.771641495738137	0.649908470294225	-0.564659891570026	-0.456562948587068	0.236952290223091	-0.330120018354777	0.682646170040459
C5	SB15	0.265751115667841	-0.808492988853771	-0.0338116247255325	-0.258169655365293	-0.993149551498441	2.07304523218033	0.498598374595772	-0.890459651655097	-0.415477990305618	0.253143474551753	0.614808392941622
C6	SB15	0.137245399565365	-0.209575836216843	-0.109324253279221	-0.323442738042555	-0.372926995369588	0.21819888216122	0.127694329532033	0.845127159572972	1.10685932901131	1.83628724007781	-0.538433816464626
C7	SB15	0.163140757973924	-0.255646386419684	-0.562400024601355	-0.649808151428868	-0.550133439977832	0.12844108181505	0.918956292334677	-0.02266624551904	-0.415477990305618	0.83640696695508	1.36102393975485
C8	SB15	0.166053985794887	-0.839206688988998	0.645802032257669	0.525107336761859	0.42450200536751	-0.210512719373993	-0.614113764245191	-0.239614597575077	0.0194755319635818	2.75284415685539	0.62810991777137
C9	SB15	0.170261981536278	-0.547426537704341	-0.562400024601356	-0.584535068751606	-0.594435051129893	0.322128968628605	-0.070121161168628	-0.456562948587068	-0.632954748565128	0.00317340652267212	-0.199244931395101
C10	SB15	0.160551222133068	-0.332430636757752	-0.562400024601356	-0.649808151428868	-0.594435051129893	0.21819888216122	-0.564659891570026	0.62817880856098	-0.198001229171018	-0.413443374196736	0.00426839990140915
C11	SB15	0.1527826146105	0.297200216014403	-0.864450538816112	-0.845627399460656	-1.34756244071493	1.95615505215739	-0.292663591856617	0.845127160617017	-1.06790826795924	-0.4967667305419	-0.334920485592774
C12	SB15	0.209752403109331	-0.378501186960592	-0.486887396047666	-0.584535068751606	-0.417228606521649	-0.0658766857530696	-0.0701211611686282	-1.10740800371113	-0.415477990305618	-0.413443374196736	0.343457284970934
C13	SB15	0.131418943923439	-0.347787486825365	-0.713425281708733	-0.780354316783394	-0.771641495738137	0.42605905509599	-0.144301970181376	-1.10740800266709	-2.80772234553568	0.753083610609916	0.072106176575587
F15	SB15	0.171556749456706	0.343270766217244	-0.486887396047666	-0.388715820719818	-0.683038273434015	0.87375788549246	-0.0948480975062108	0.628178808560981	-0.198001229171018	-1.35298604418162	-0.809784924010655
C14	SB15	0.145014007087932	0.143631715338268	-0.486887396047666	-0.323442738042555	-0.107117328457222	-0.34995225366736	-0.811929254945852	0.194282106536996	0.0194755319635818	-0.83006015441294	-1.01329825530717
C15	SB15	0.21525516677115	0.32791391614963	-0.335862138940288	-0.0623504073335048	0.0257875049989612	-0.251430594737033	-1.0344716819841	-0.890459651655097	-1.50286178735335	-0.91338351040586	-1.28464936370251
C16	SB15	0.139187551446007	-0.777779288718544	0.192726260935535	0.198741923375546	0.335898783063388	-0.508130692654932	-0.515206018894861	-0.239614596531032	0.671905809617202	0.169820118709795	0.00426839990140884
C17	SB15	0.154077382530929	-0.777779288718544	0.268238889489224	0.198741923375546	0.0257875049989612	0.12844108181505	0.721140801634016	0.411230457548988	0.019475531963583	-0.0801499498224914	0.546970615842785
GN	SB15	0.142424471247077	-0.624210788042409	0.645802032257669	0.916745832825434	2.06366161799377	-2.32352987256085	1.43822195907366	-0.239614597575077	1.10685932901131	2.5028740883231	0.614808392941622
C18	SB15	0.203602255487298	-0.639567638110022	-0.0338116247255325	-0.19289657268803	-0.94884794034638	2.09051511842021	1.41349502273607	-0.456562948587069	-1.28538502621875	0.336466830896917	1.02183505468533
C19	SB15	0.172851517377134	0.128274865270654	-0.0338116247255325	0.133468840698283	0.114390727303083	-0.152334467419971	-1.33119492168483	-0.67351129959906	0.454429051357692	-0.746736798570981	-0.334920485168116
M2	SB15	0.202631179546977	2.75429622683257	2.91118088886834	3.00548447849784	2.55097934066644	-1.03672066570231	0.993137101347425	0.62817880856098	0.236952290223092	-0.996706866549742	-1.28464936327785
C20	SB15	0.171233057476599	-0.317073786690138	-1.24201368158456	-1.36781206087876	-1.6133721076273	1.64625443501893	-0.8861100639586	0.411230456504944	-0.415477987430528	0.086496762364631	0.479132838743949
C21	SB15	0.16896721361585	-0.654924488177636	-0.109324253279221	-0.0623504073335048	0.0700891161510221	-0.34995225366736	-0.515206018894861	-0.239614596531032	1.10685932901131	-0.246796662009614	1.42886171727835
C22	SB15	0.166701369755101	2.70822567662973	2.53361774609989	2.35275365172521	1.70924872877728	-0.346022354233526	-0.41629827354453	-0.0226662455190401	1.32433608727082	0.503113542580835	-1.7462122777153
SB	SB15	0.171233057476599	3.33785652940188	2.68464300320727	2.67911906511153	1.88645517338552	-0.259564572566625	0.67168692895885	3.66545572899314	-0.632954748565128	1.0030536791422	0.0721061770002454
C23	SB15	0.15181153867018	0.0207769147973596	-0.260349510386599	-0.323442738042555	-0.284323773065466	0.0380534007143152	-0.985017809308931	-0.239614597575077	0.671905809617202	-0.580090086383859	-0.131407154296264
C24	SB15	0.130771559963225	-0.332430636757752	-0.562400024601356	-0.519261986074343	-0.0185141061530998	-0.747658046396395	1.90803375313747	0.628178808560981	0.4544290484826	0.00317340652267212	0.479132838743949
C25	SB15	0.222052698353397	-0.578140237839568	-0.2603495103866	-0.323442738042555	-0.284323773065466	0.0245109953476654	1.09204484669775	-0.239614596531032	-0.415477987430528	-1.24667693472978	1.08967283178416
C26	SB15	0.118147572739052	-0.163505286014003	0.343751518042913	0.590380419439121	1.44343906186491	-1.85426150468672	-0.366844400869365	0.194282106536996	0.671905809617202	0.00317340601946753	-0.267082708069279
C27	SB15	0.249242824682384	-0.593497087907182	0.0417010038281565	-0.0623504073335048	0.0257875049989612	-0.251430594737033	0.350236756570276	-1.10740800266709	-0.632954748565128	0.16982011820659	1.42886171685369
C28	SB15	0.123326644420764	-0.593497087907182	-0.562400024601356	-0.519261986074343	-0.328625384217527	-0.169176891465889	0.894229355997094	0.411230457548988	0.236952290223091	-0.246796662009614	0.0721061770002459
C29	SB15	0.133684787784188	-0.0713641856083216	-0.109324253279221	-0.19289657268803	-0.328625384217527	0.332159430045198	0.325509816582949	1.06207551162901	0.236952290223091	-0.663413442225818	-0.063569377197428
C30	SB15	0.154077382530929	-0.332430636757752	-0.411374767493978	-0.388715820719818	-0.0185141061530998	-0.584222361949773	-0.441025209882113	-0.239614597575077	0.889382570751803	-0.246796662009614	-0.470596039365789
C31	SB15	0.155372150451356	0.28184336594679	-0.637912653155044	-0.258169655365293	0.202993949607205	-0.843846549594366	-1.0344716819841	-0.673511300643105	0.889382570751803	-0.996706866549742	-1.21681158660368
